# Supplementary material for: Controllable conformation and reactivity of bicyclic α-methylene cyclopentanones and their NF-κB pathway inhibitory activity
Source: Royal Society of Chemistry journal article supplement (doi:10.1039/d3ob00357d), 2023-01-01

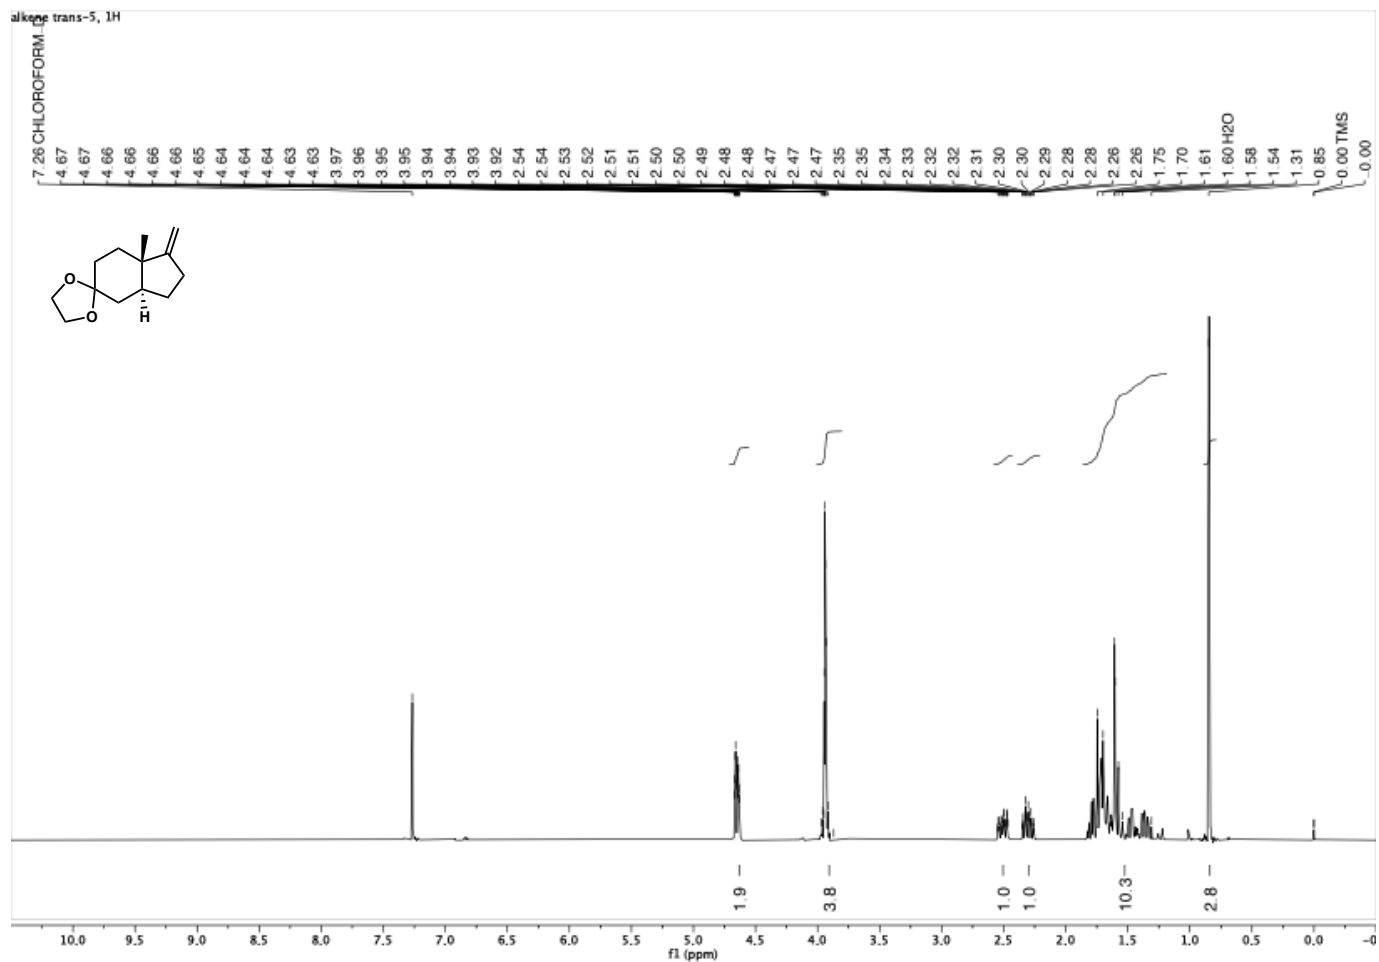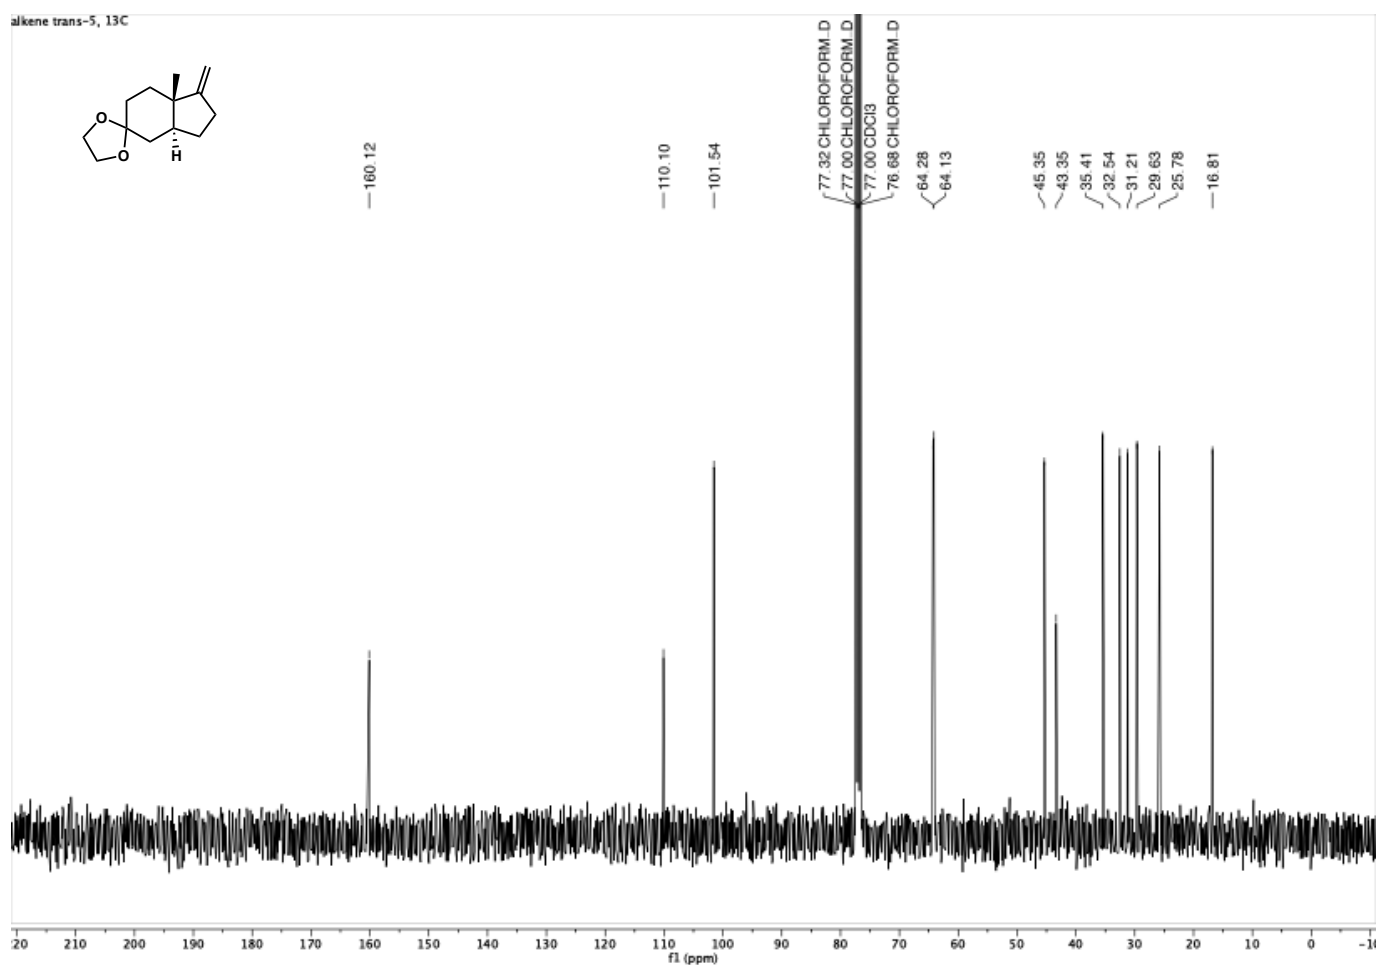

MCP-1, 1H

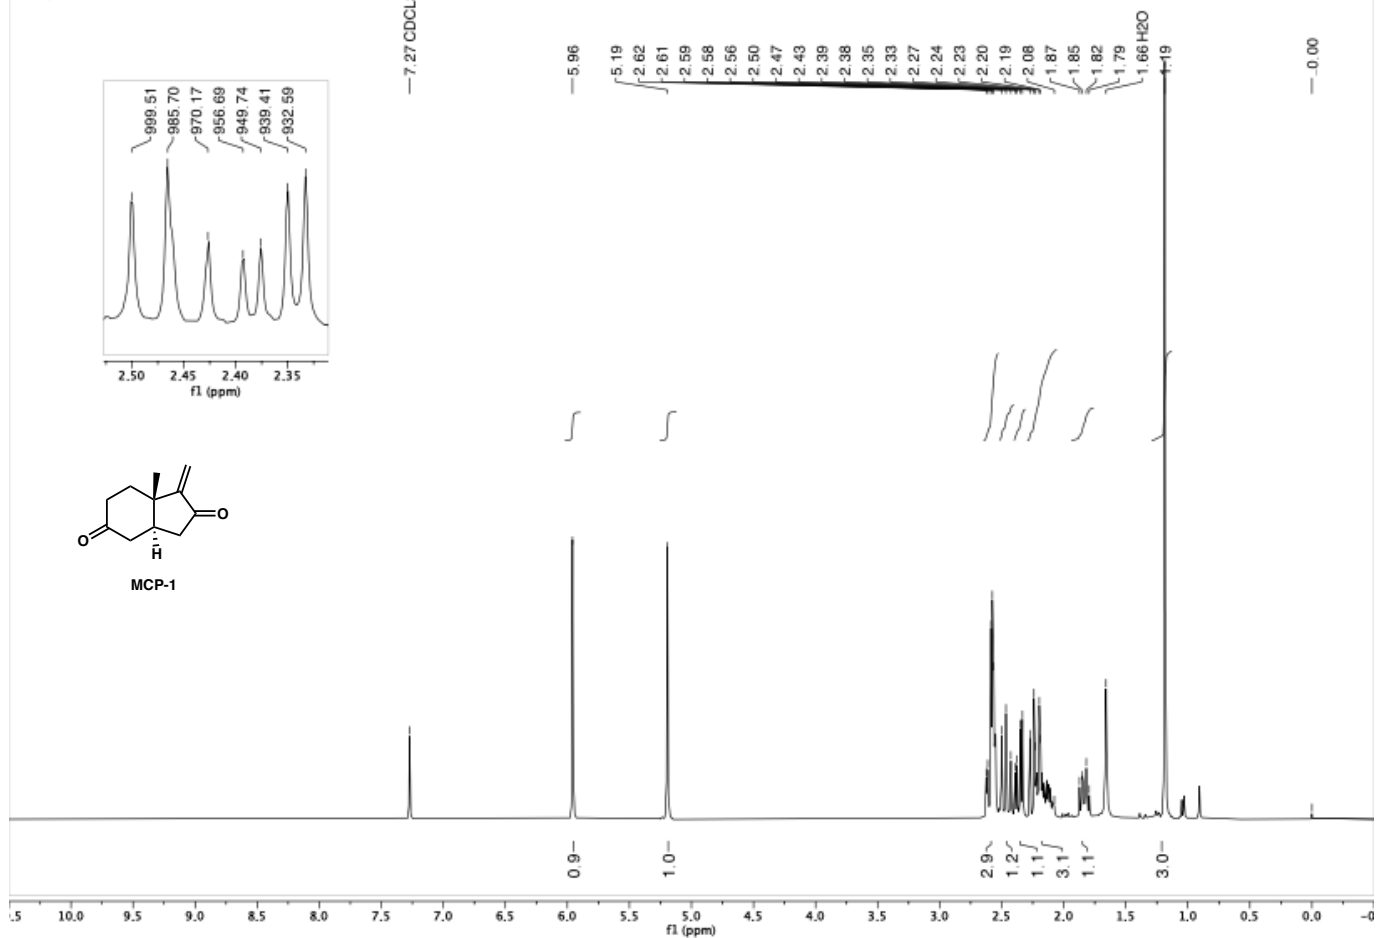

MCP-1\_13C

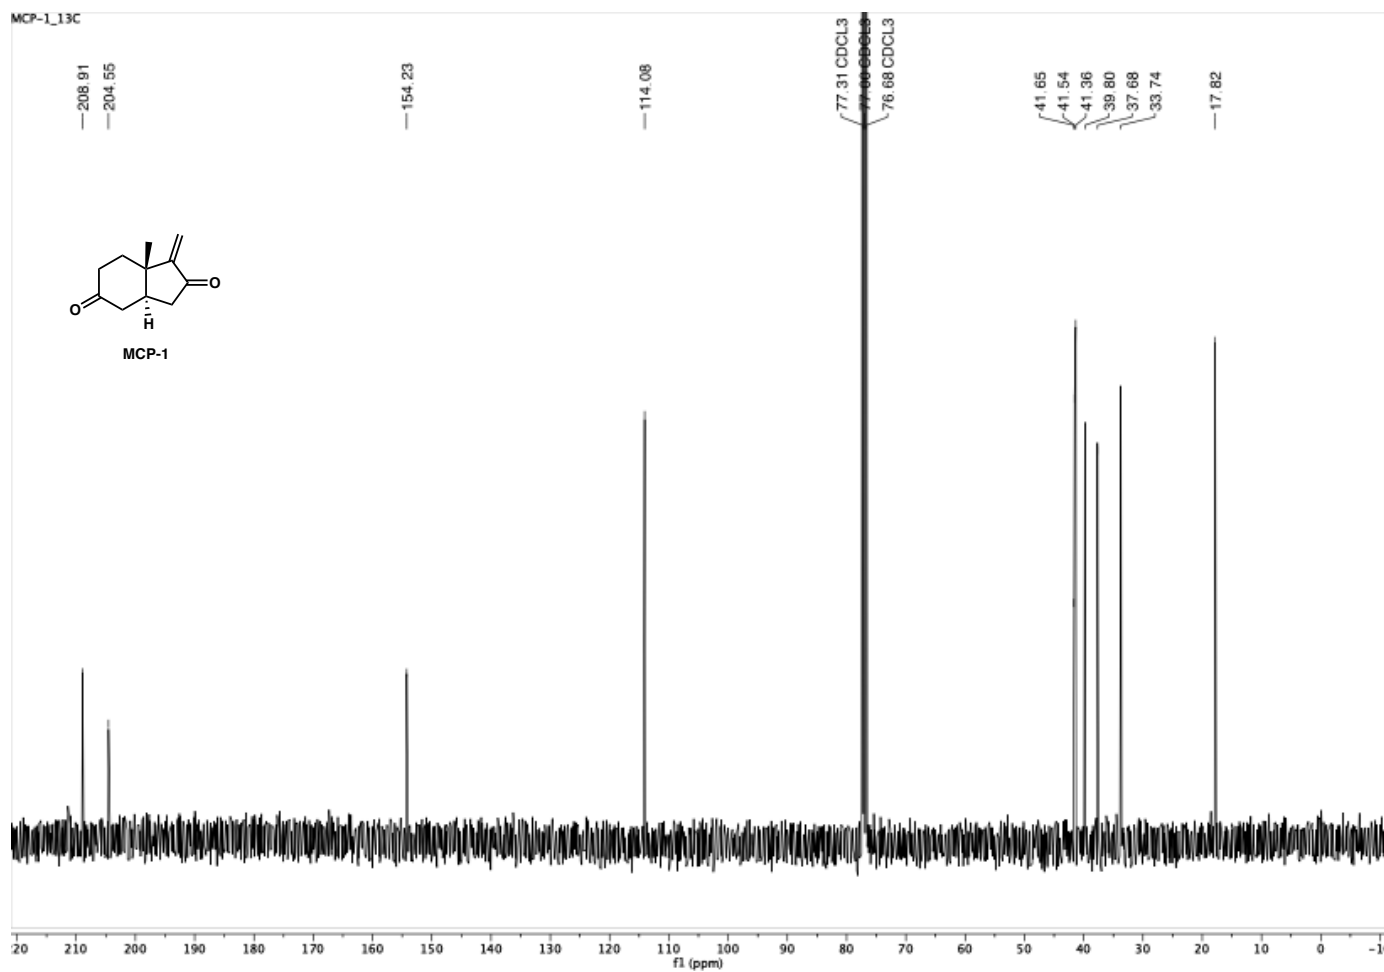

MCP-2, 1H

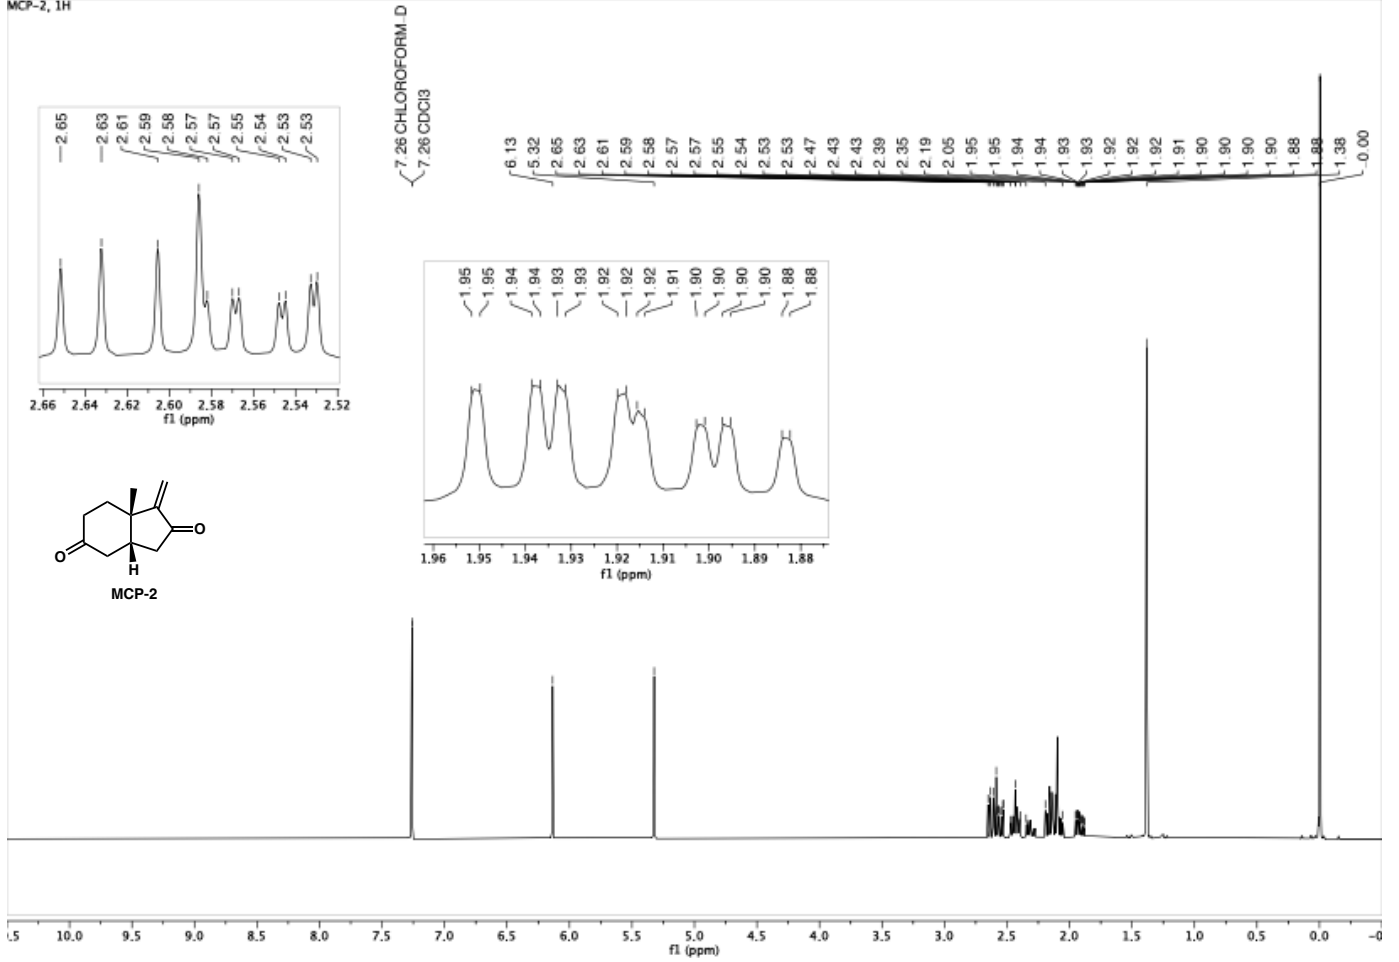

MCP-2, 13C

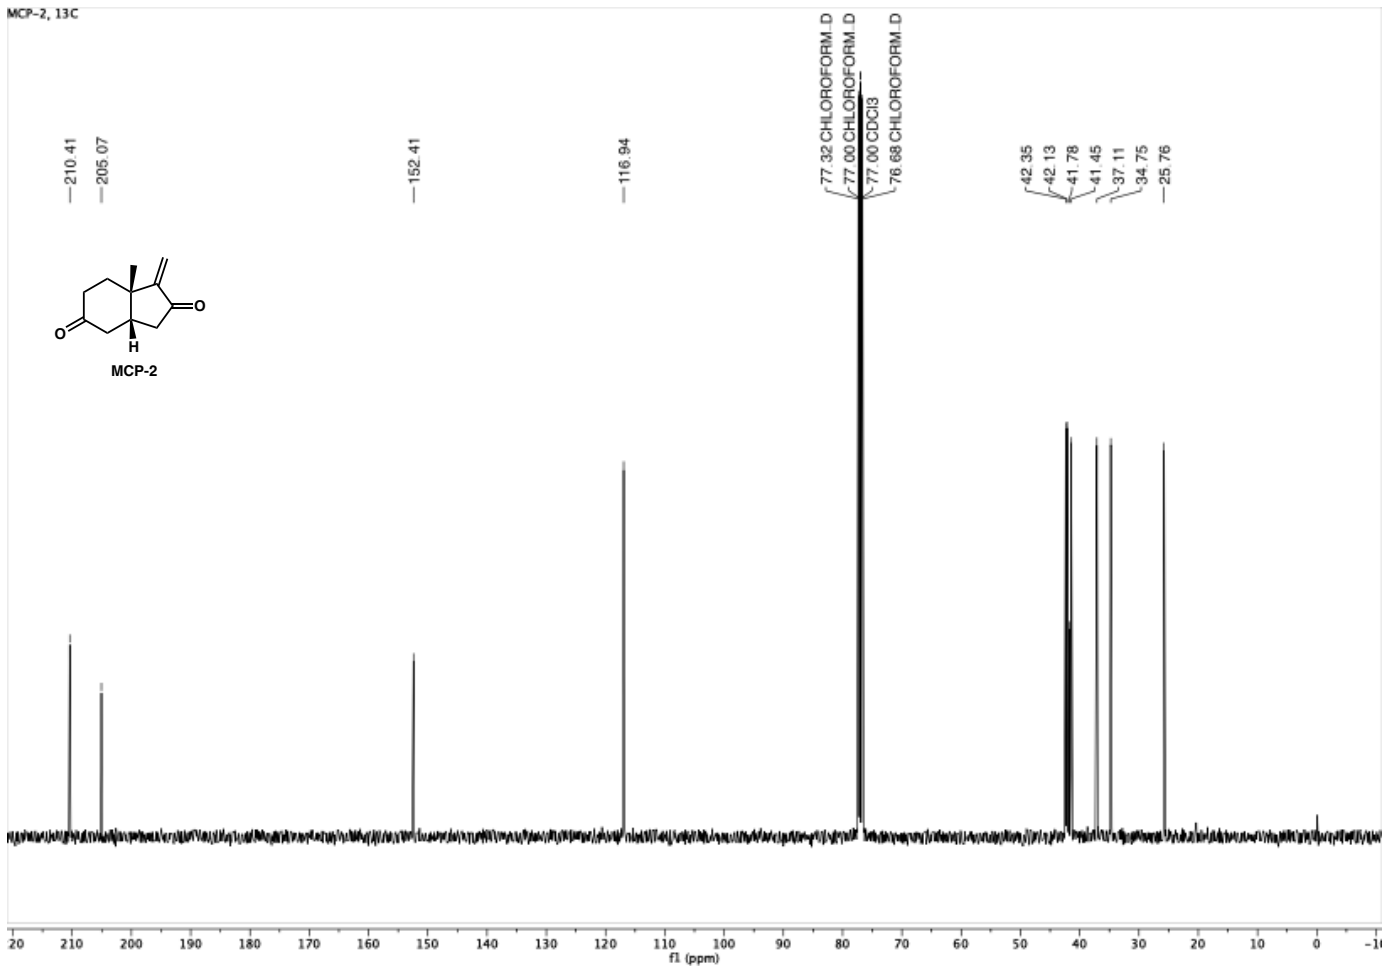

alkene Pr, 1H

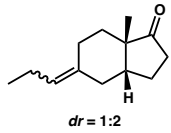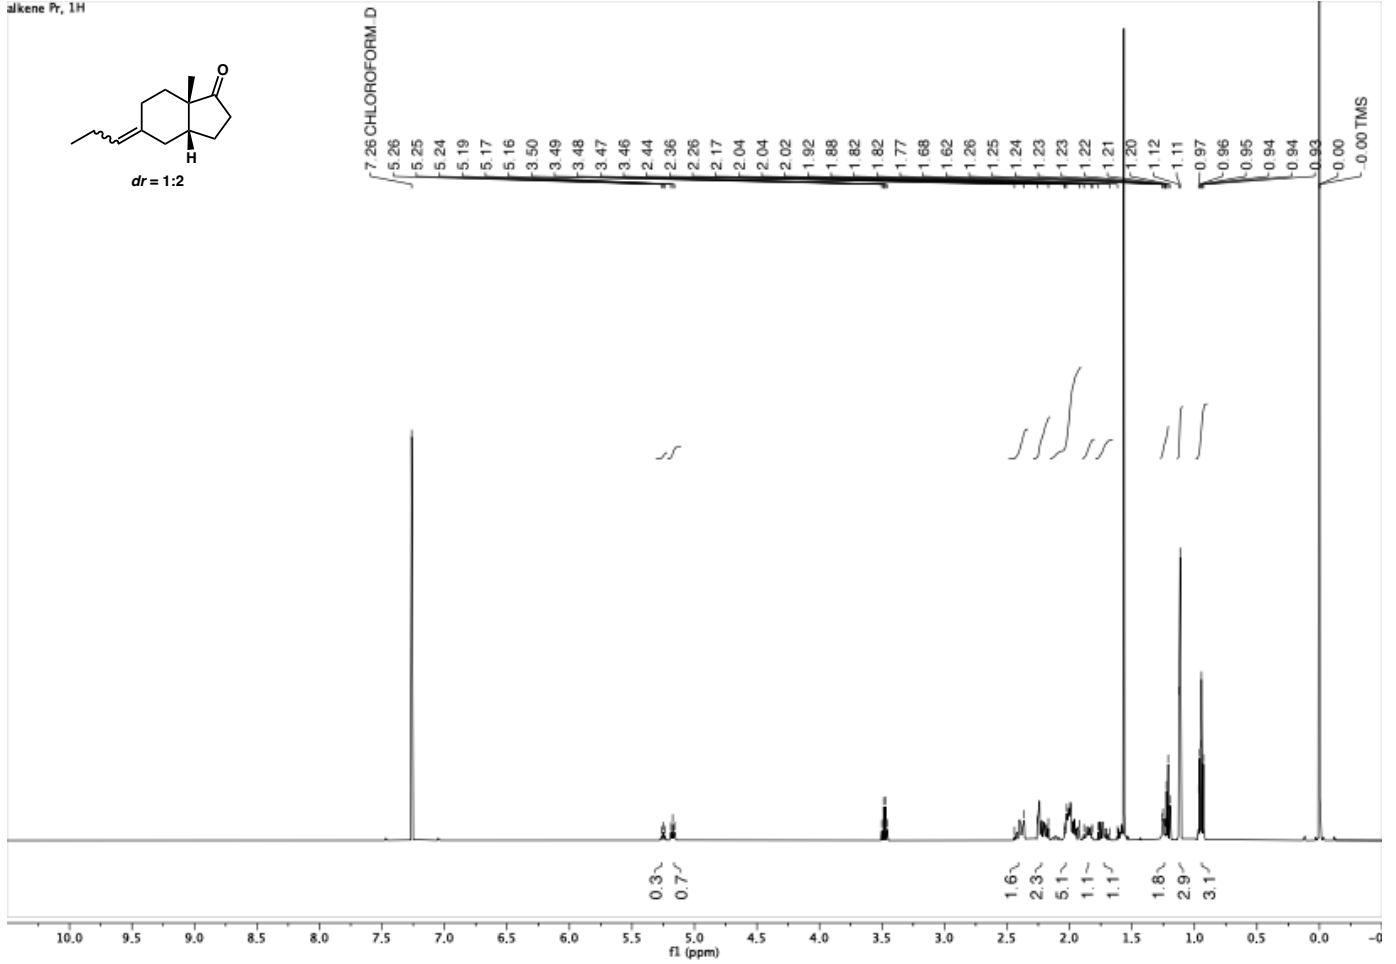

alkene Pr, 13C

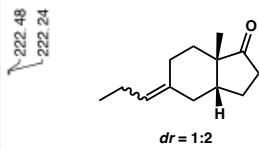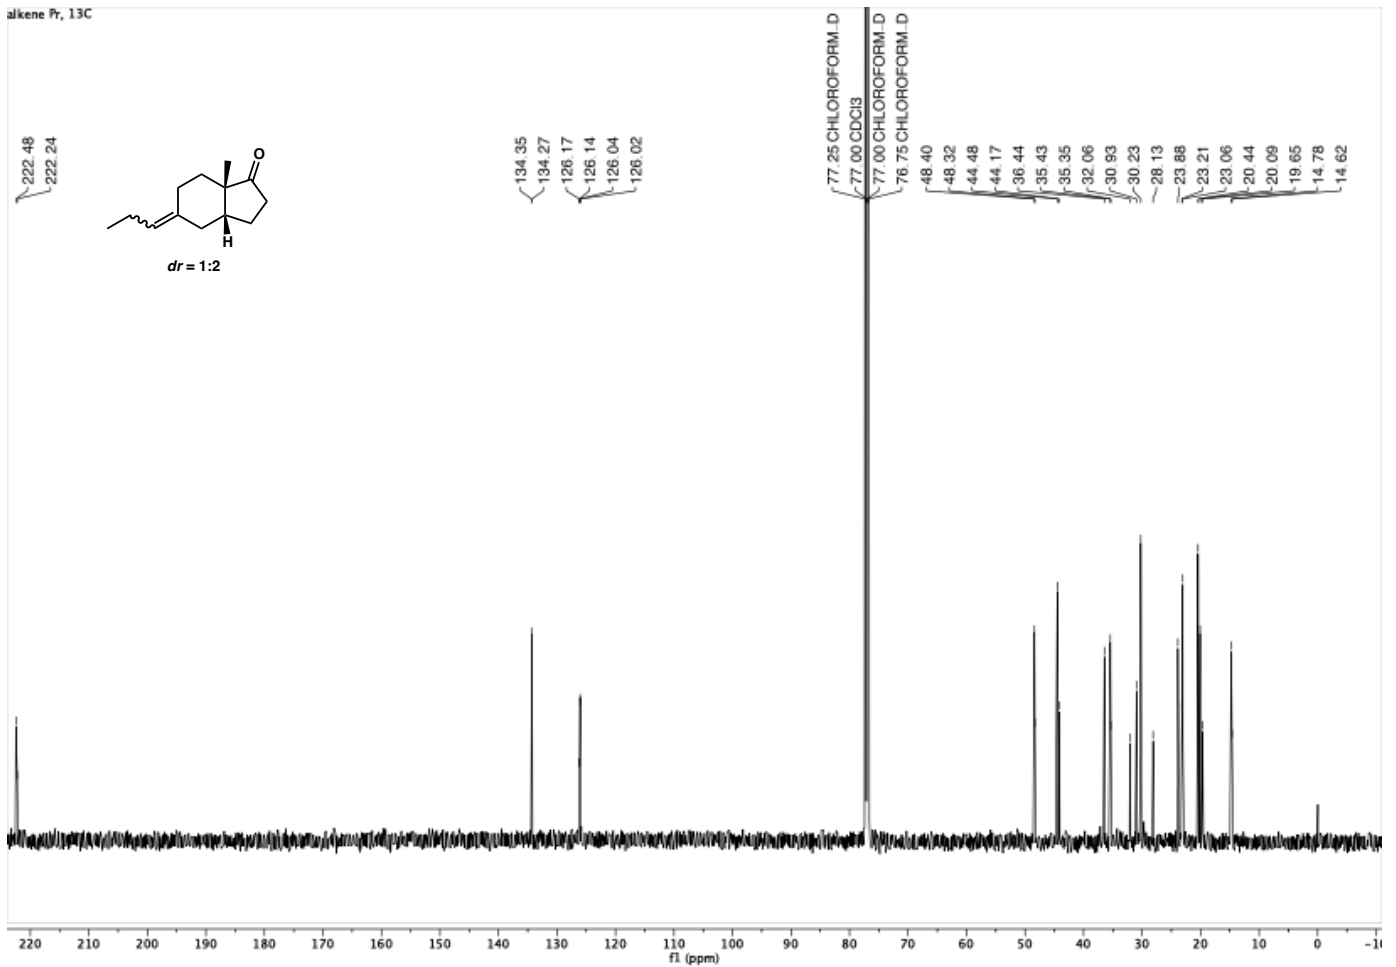

Pr\_ketone\_a, 1H

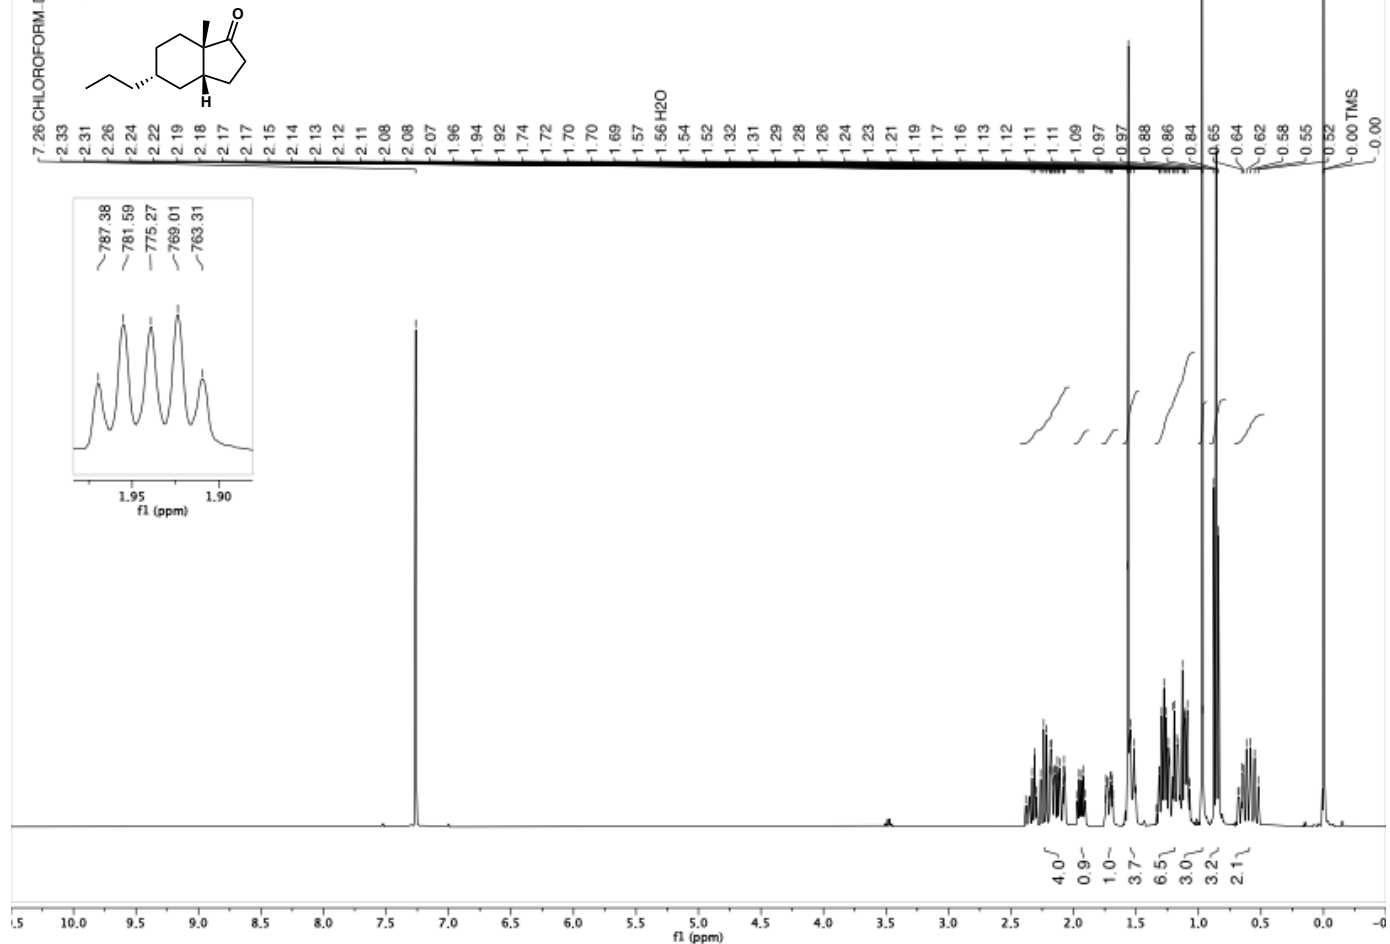

Pr\_ketone\_a, 13C

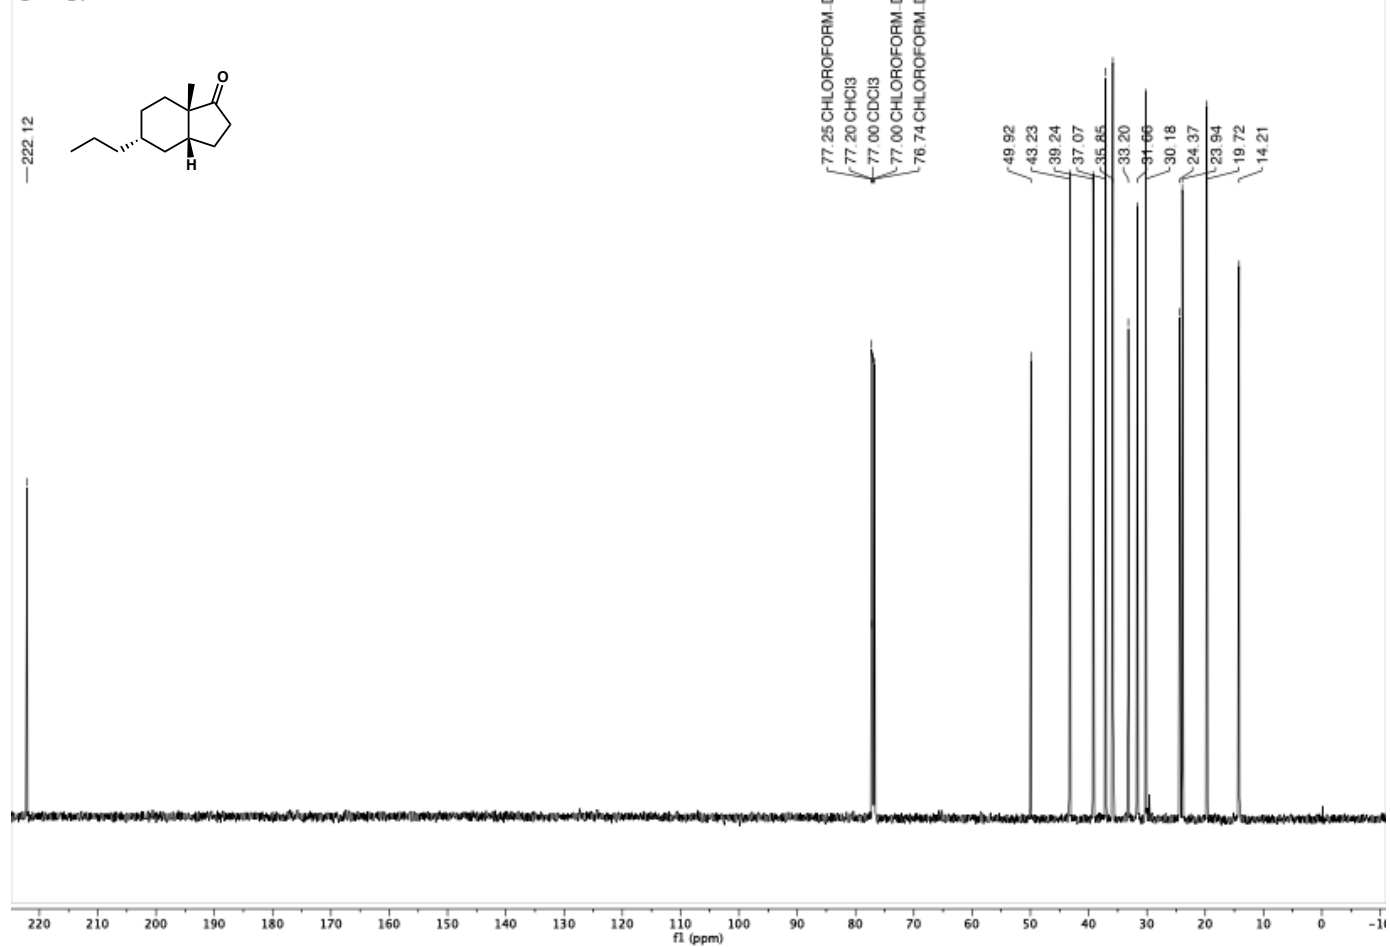

Pr\_ketone\_b, 1H

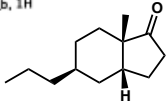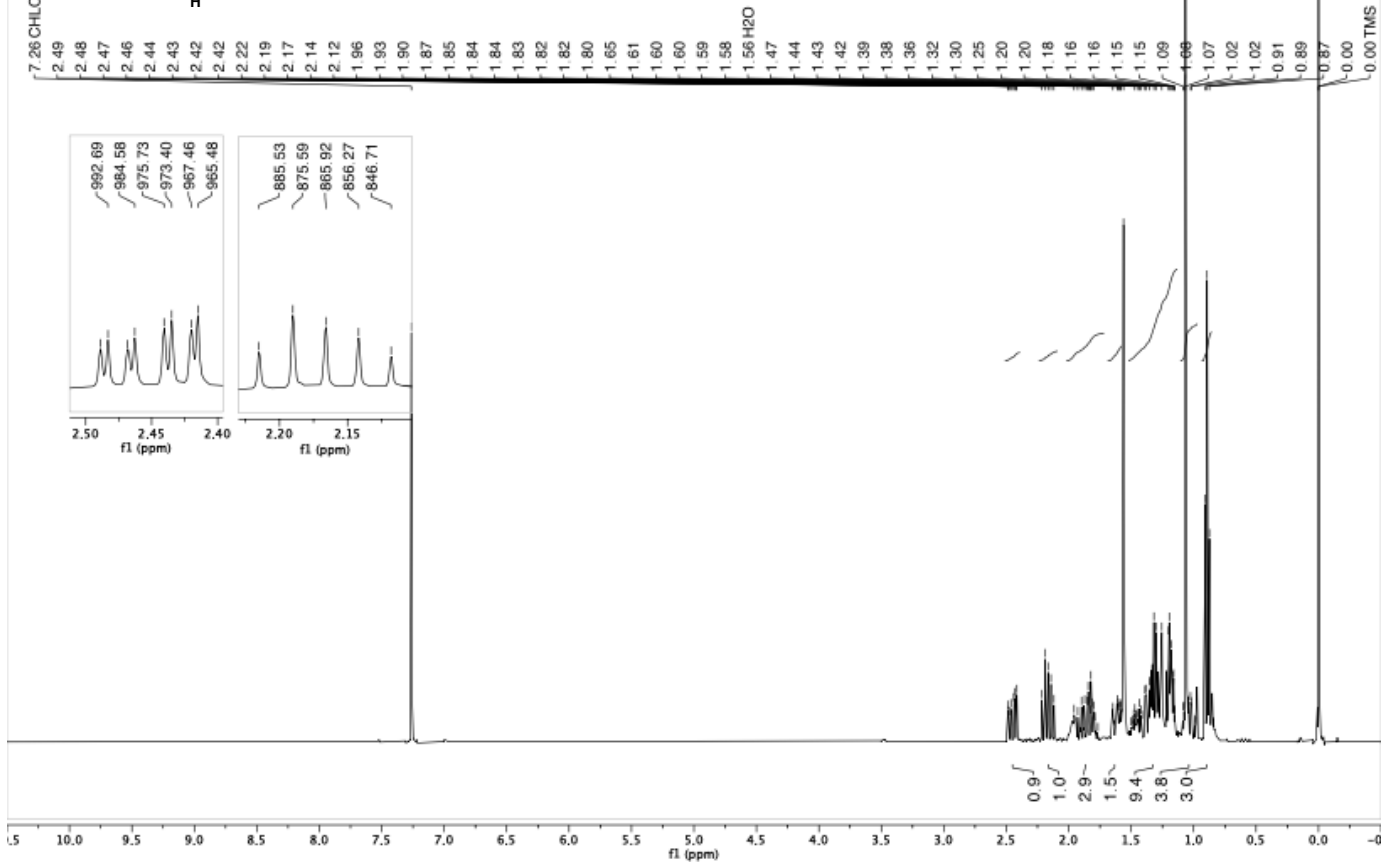

Pr\_ketone\_b, 13C

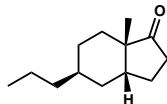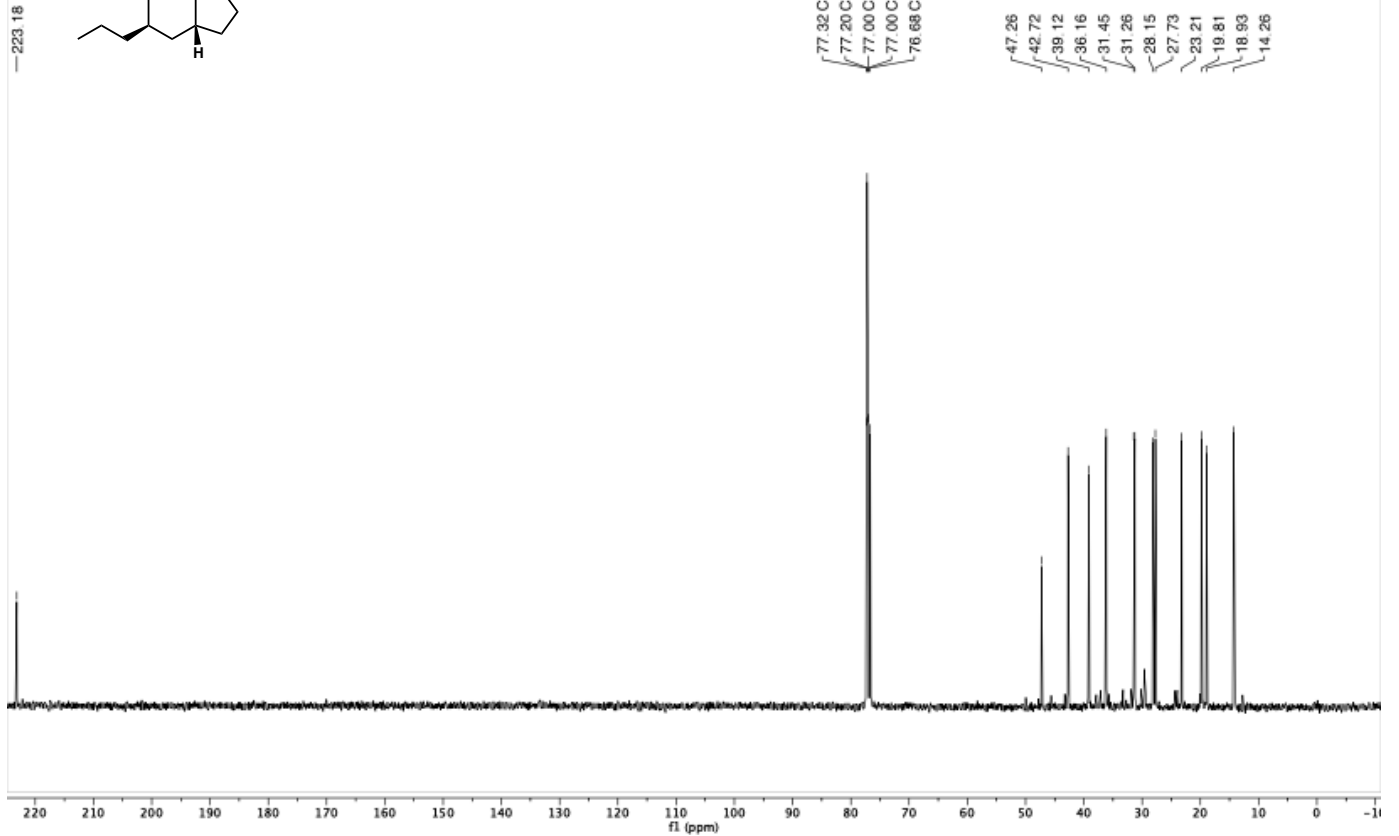

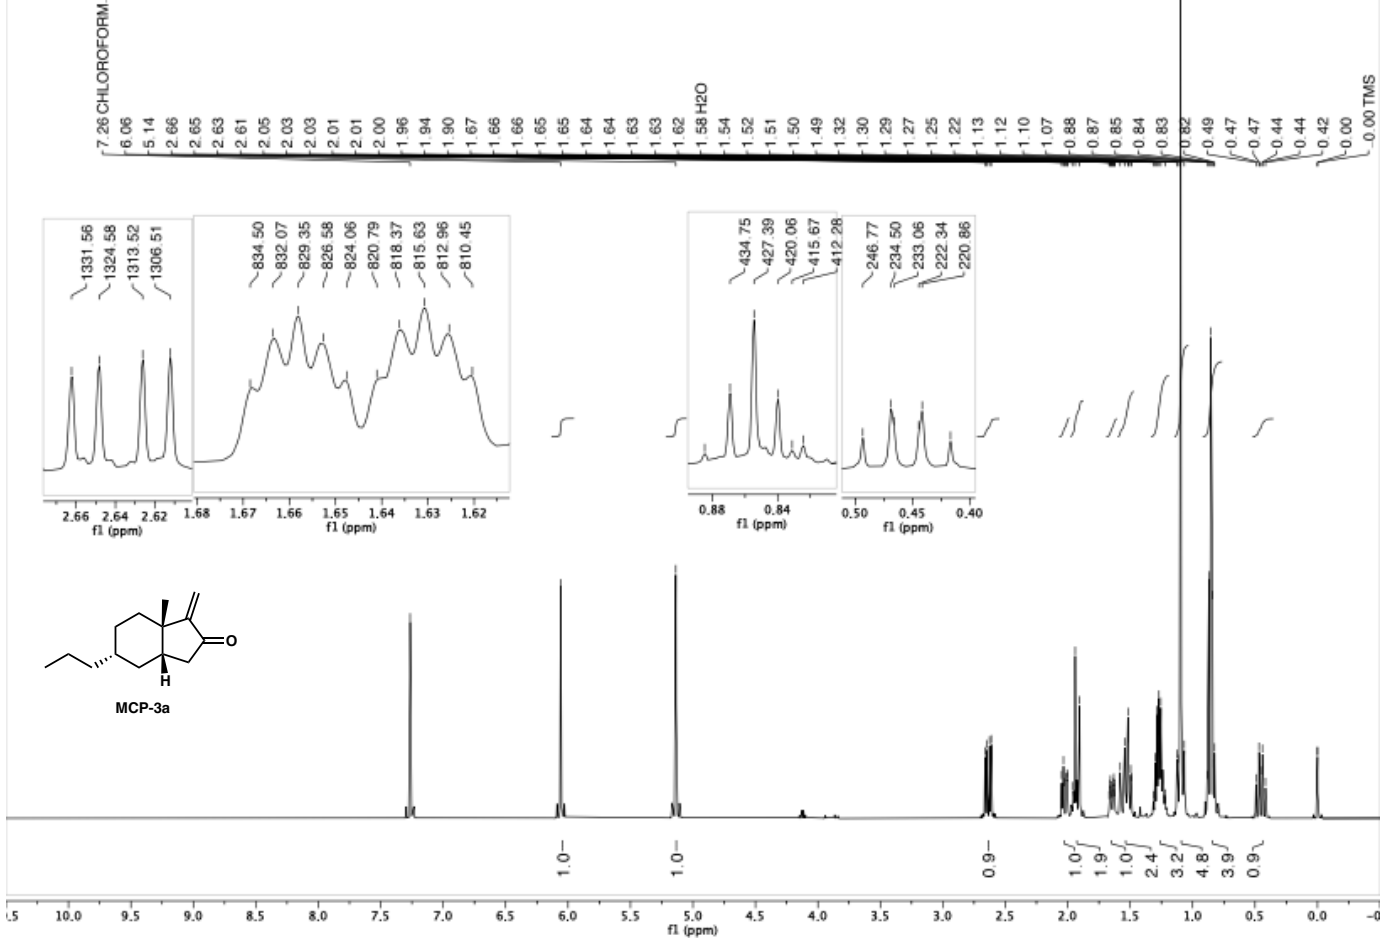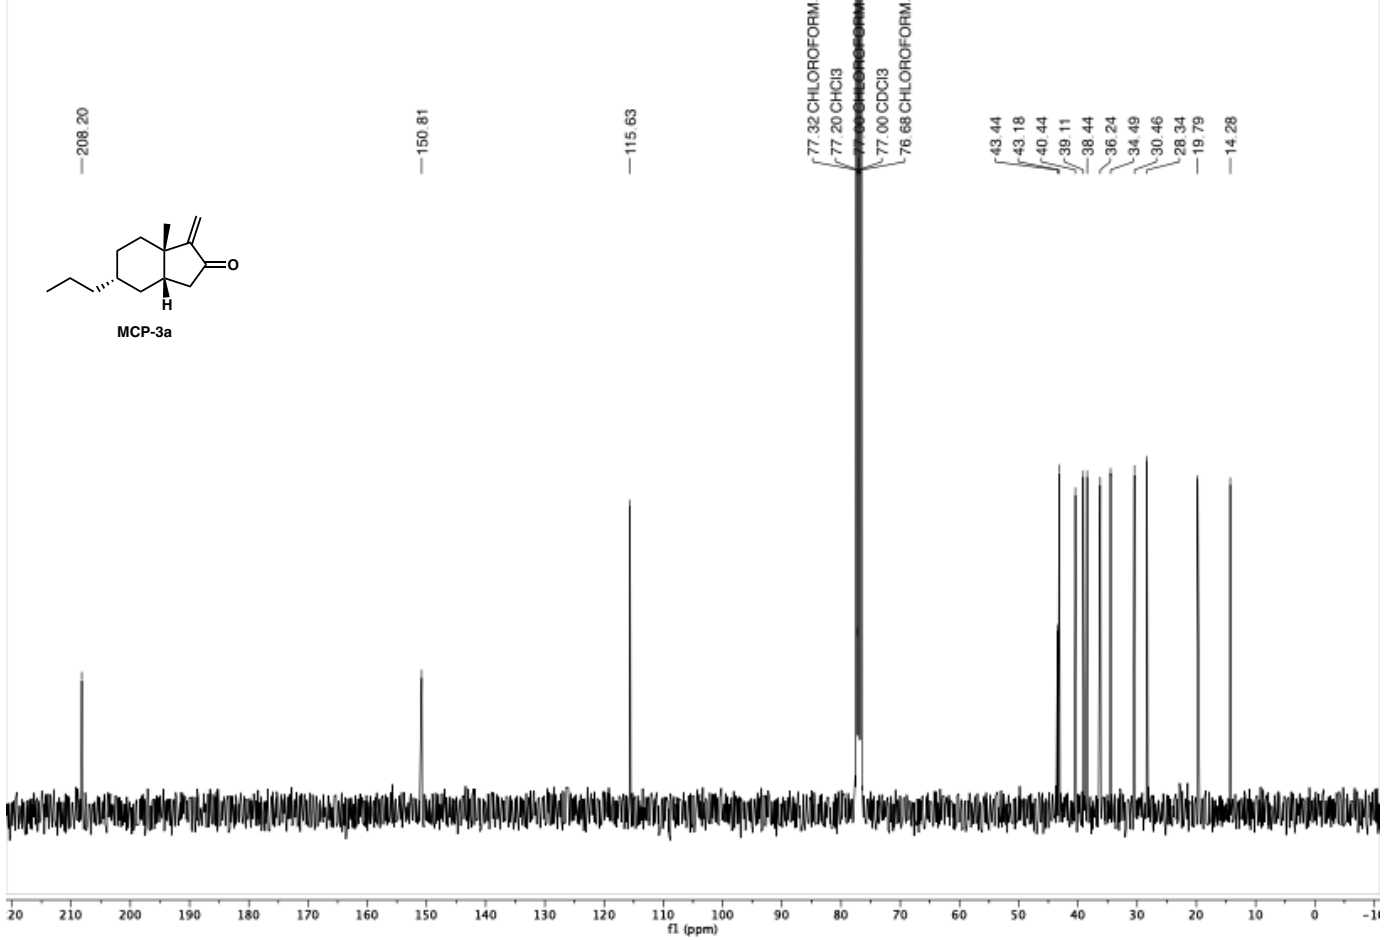

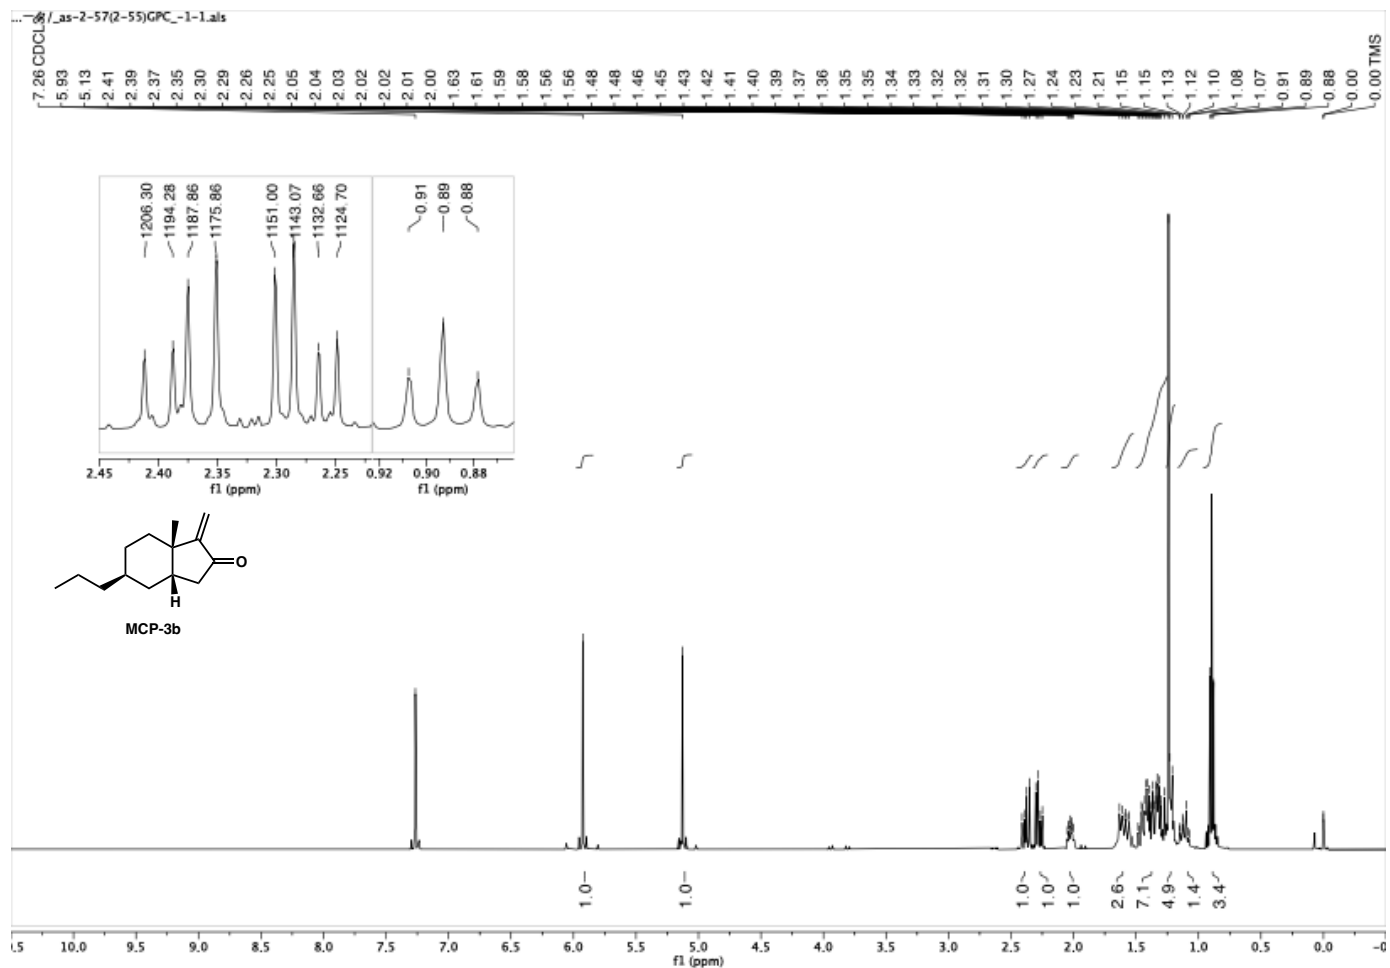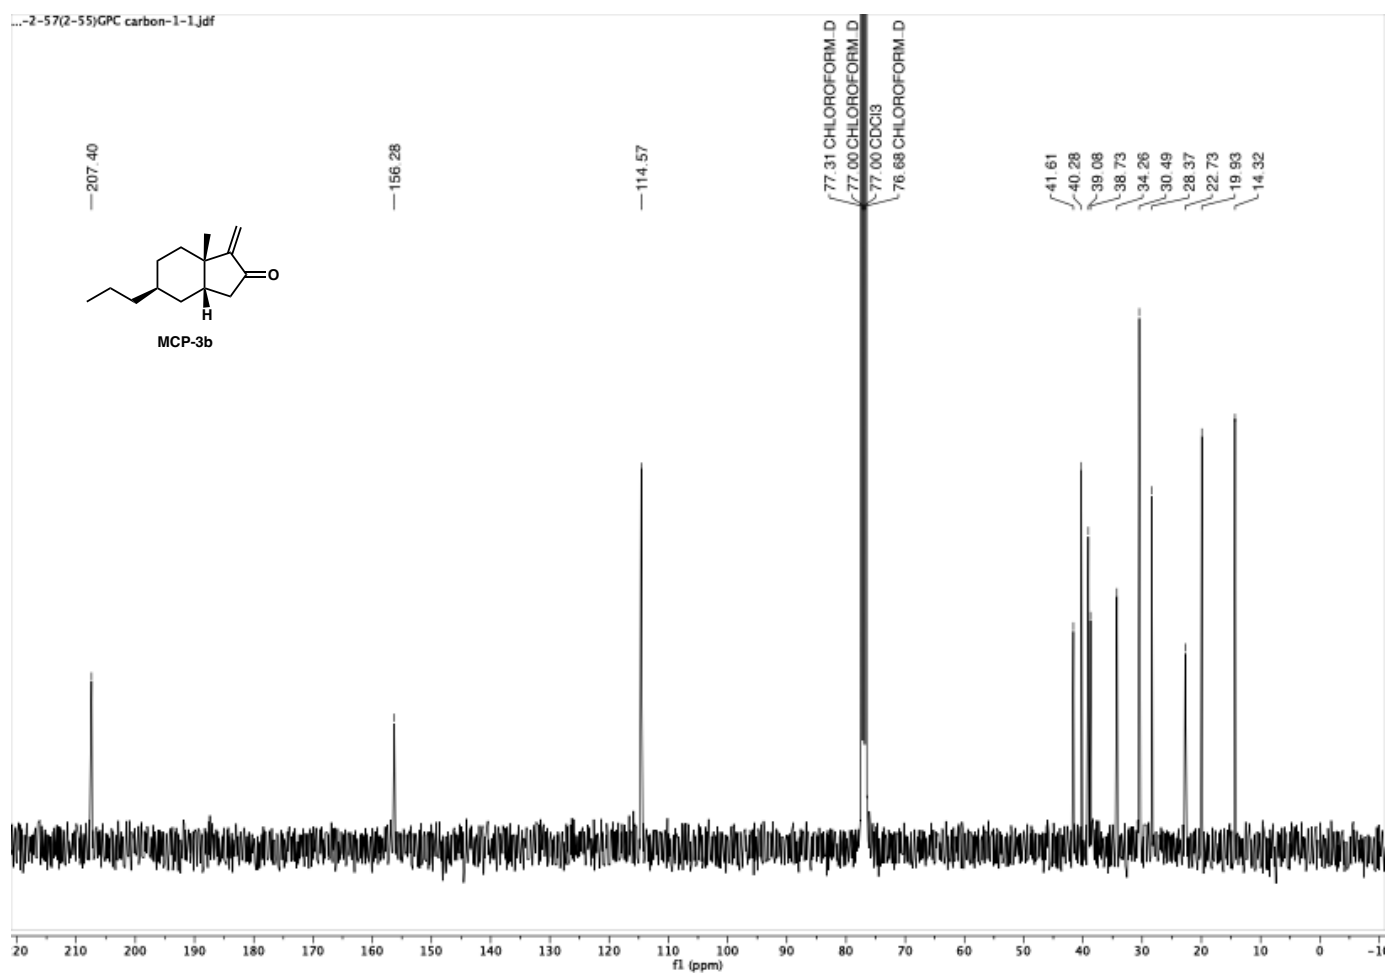



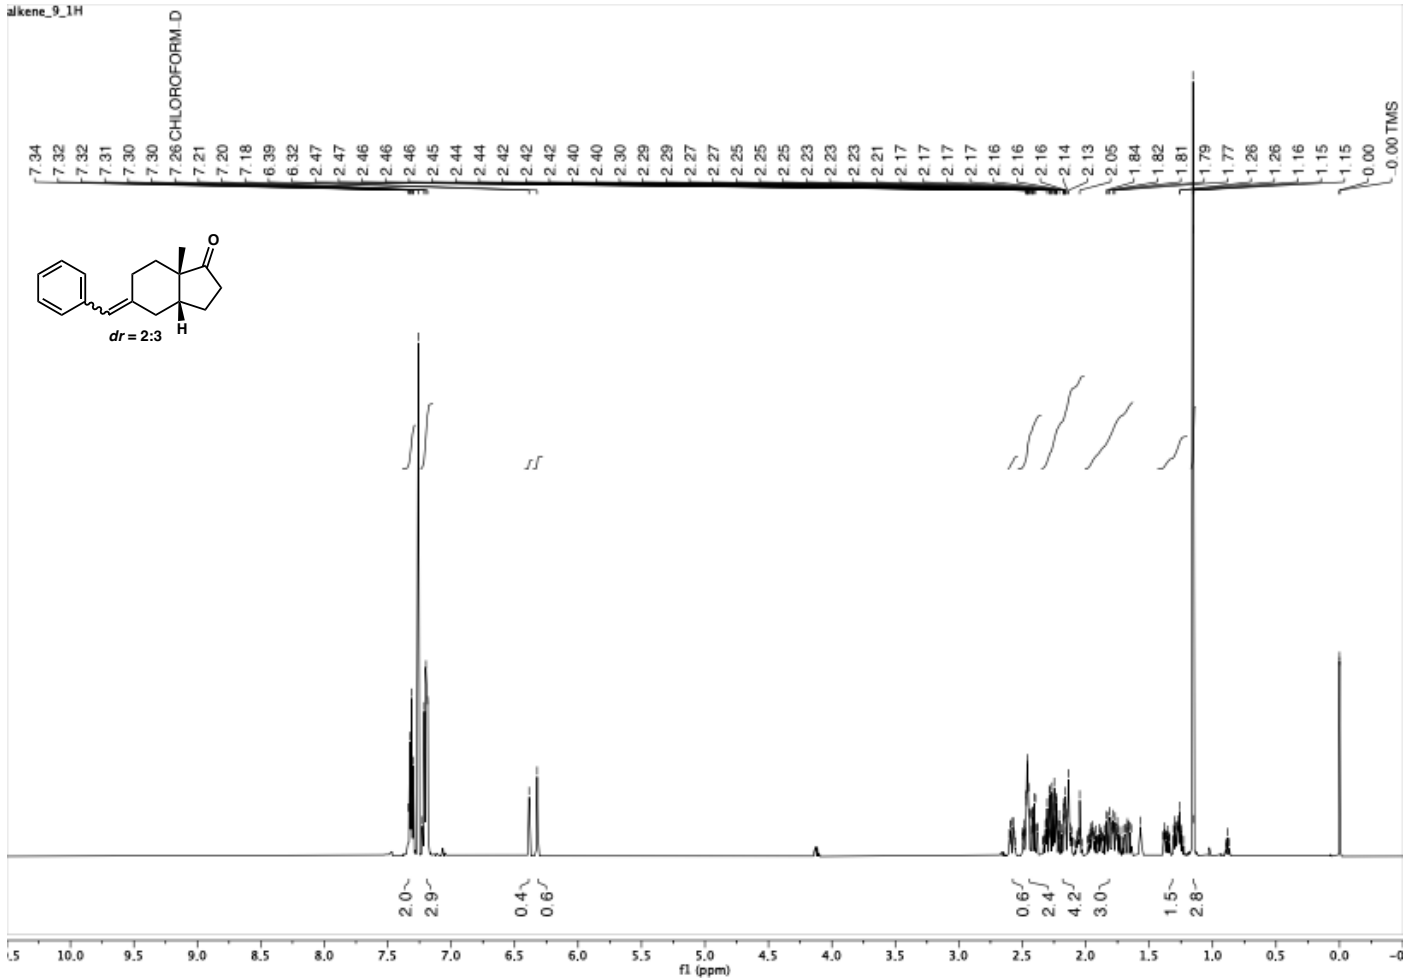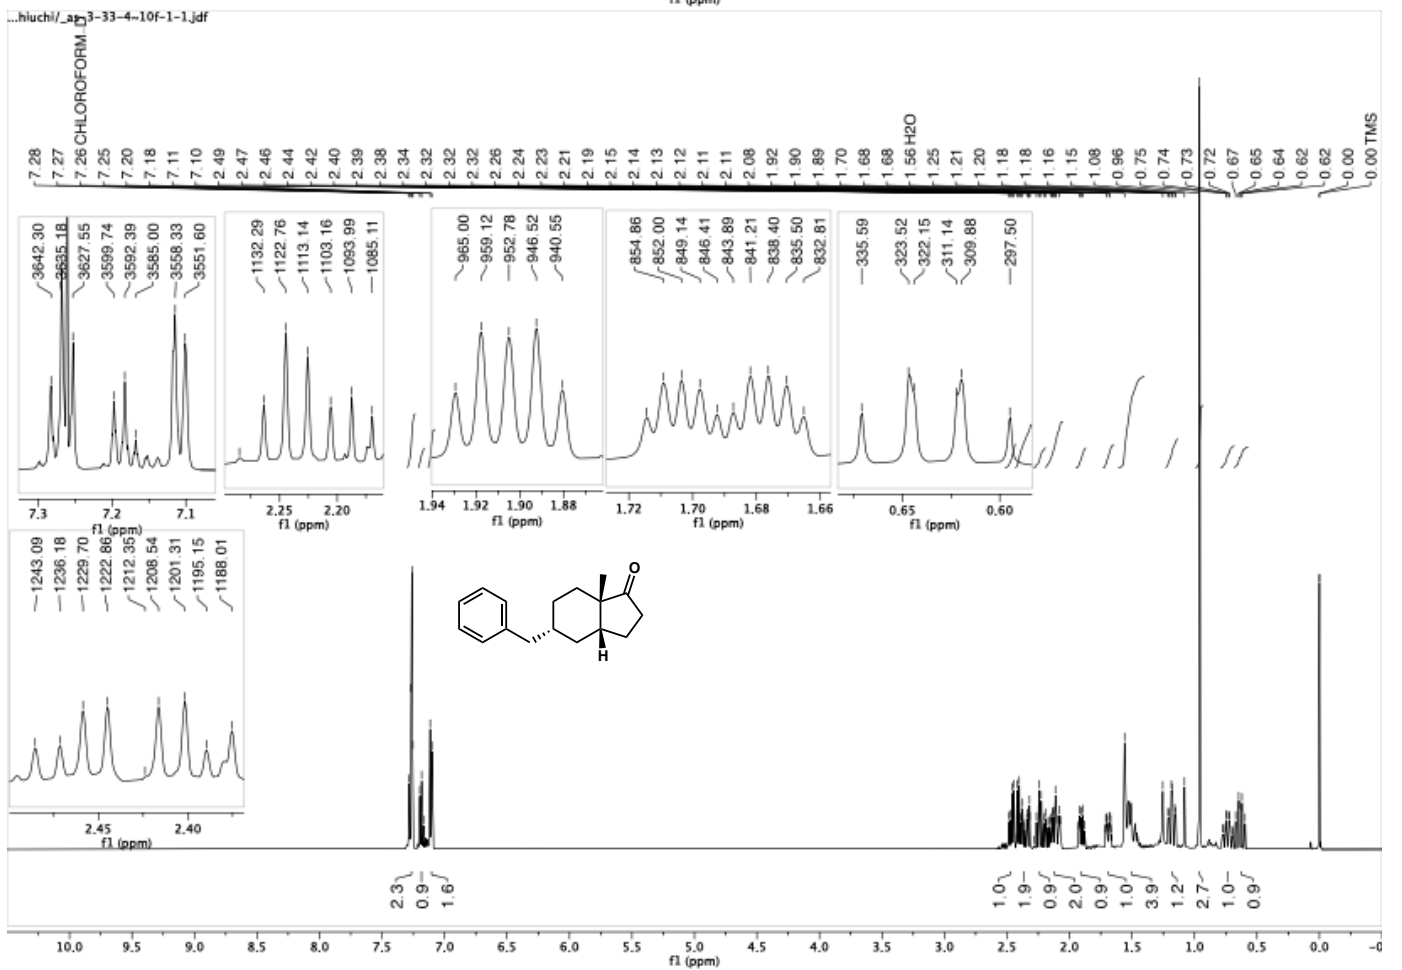

alkene trans-5-H

7.30  
7.28  
7.27  
7.26 CHLOROFORM  
7.21  
7.20  
7.18  
7.15  
7.14  
2.54  
2.53  
2.51  
2.50  
2.47  
2.46  
2.44  
2.44  
2.42  
2.42  
2.41  
2.40  
2.19  
2.17  
2.15  
2.14  
2.13  
2.11  
1.84  
1.83  
1.81  
1.79  
1.65  
1.62  
1.62  
1.62  
1.61  
1.54  
1.53  
1.53  
1.42  
1.41  
1.39  
1.39  
1.38  
1.38  
1.37  
1.35  
1.34  
1.32  
1.19  
1.16  
1.15  
1.12  
1.11  
1.08  
0.96  
0.00  
0.00 TMS

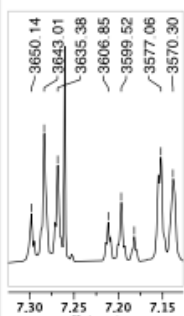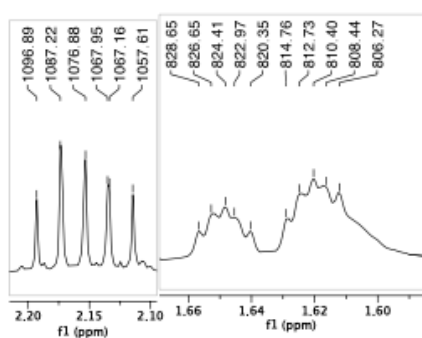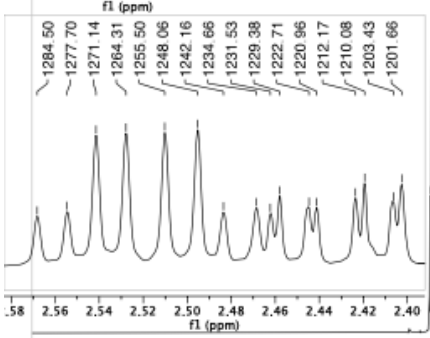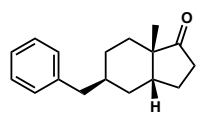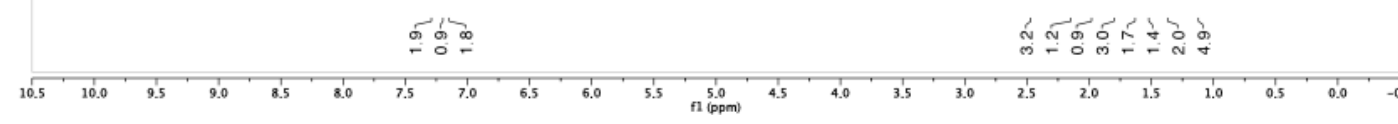

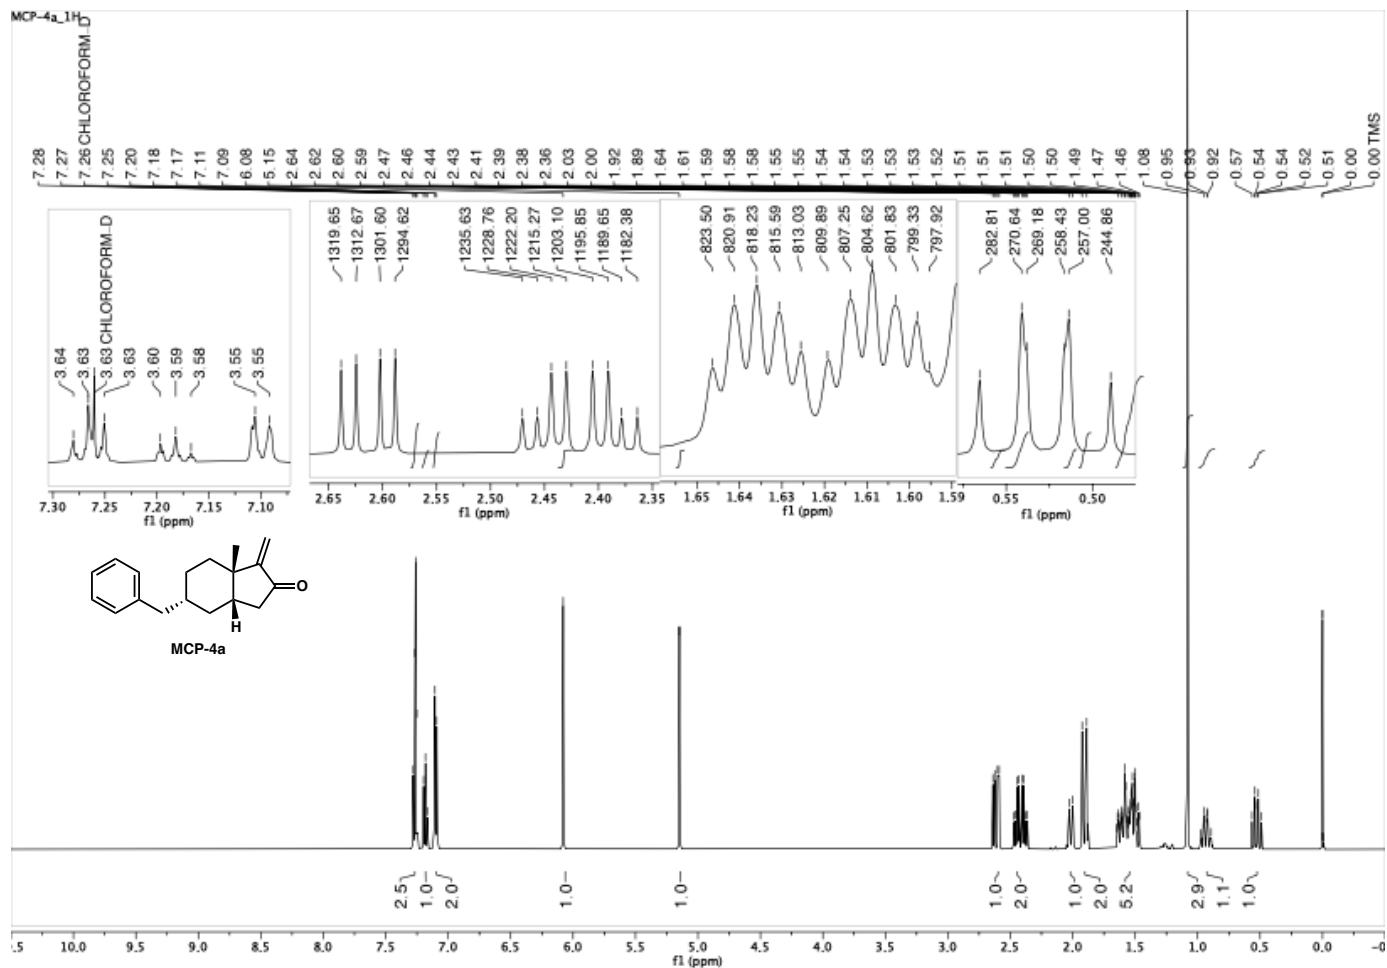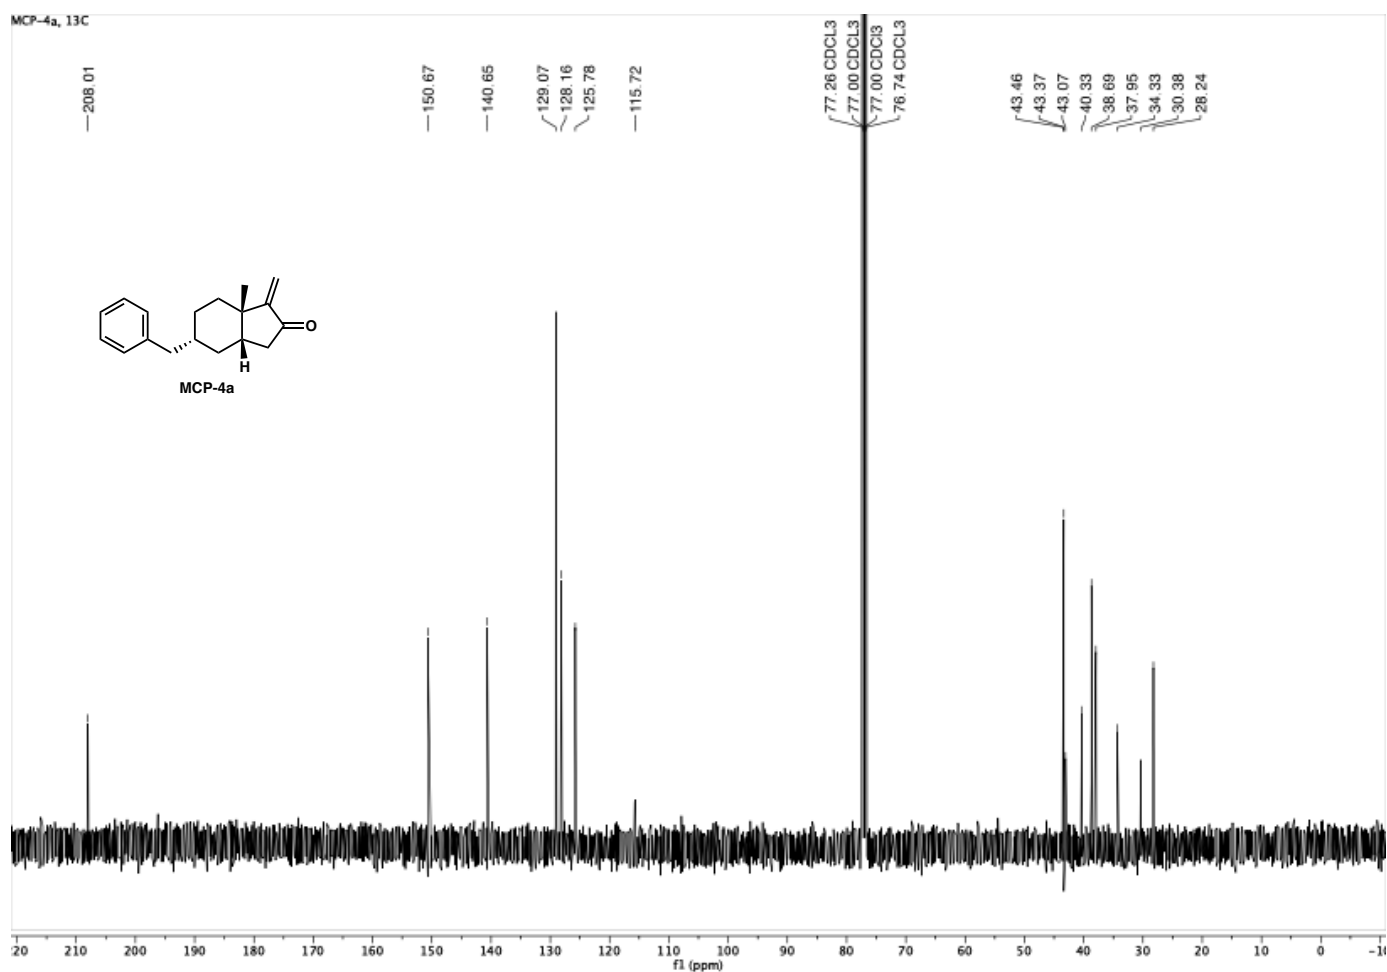



alkene trans-5, 1H

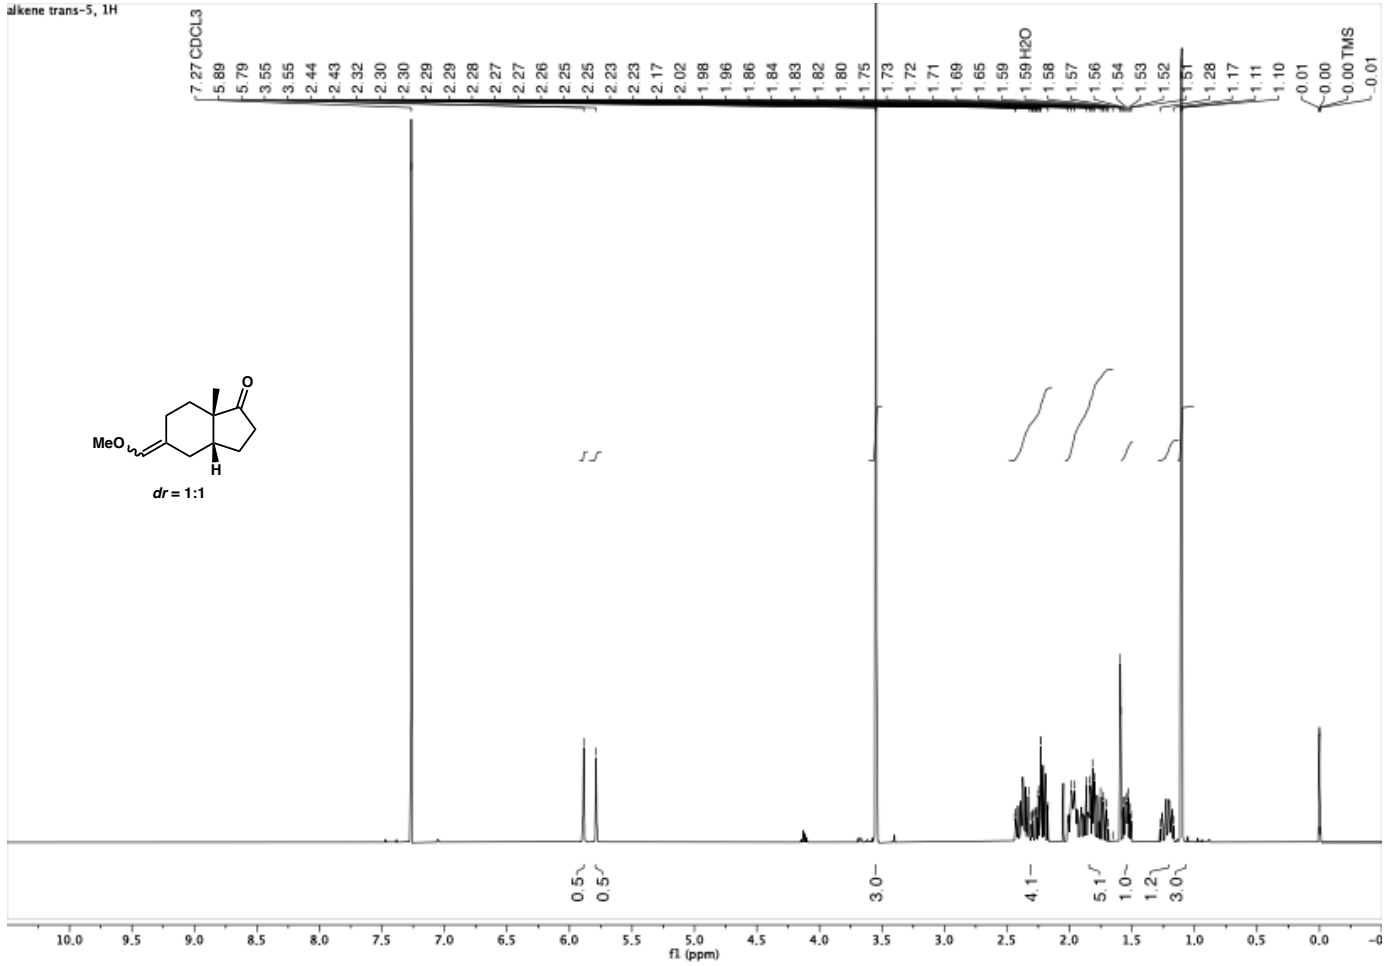

reductant\_1H

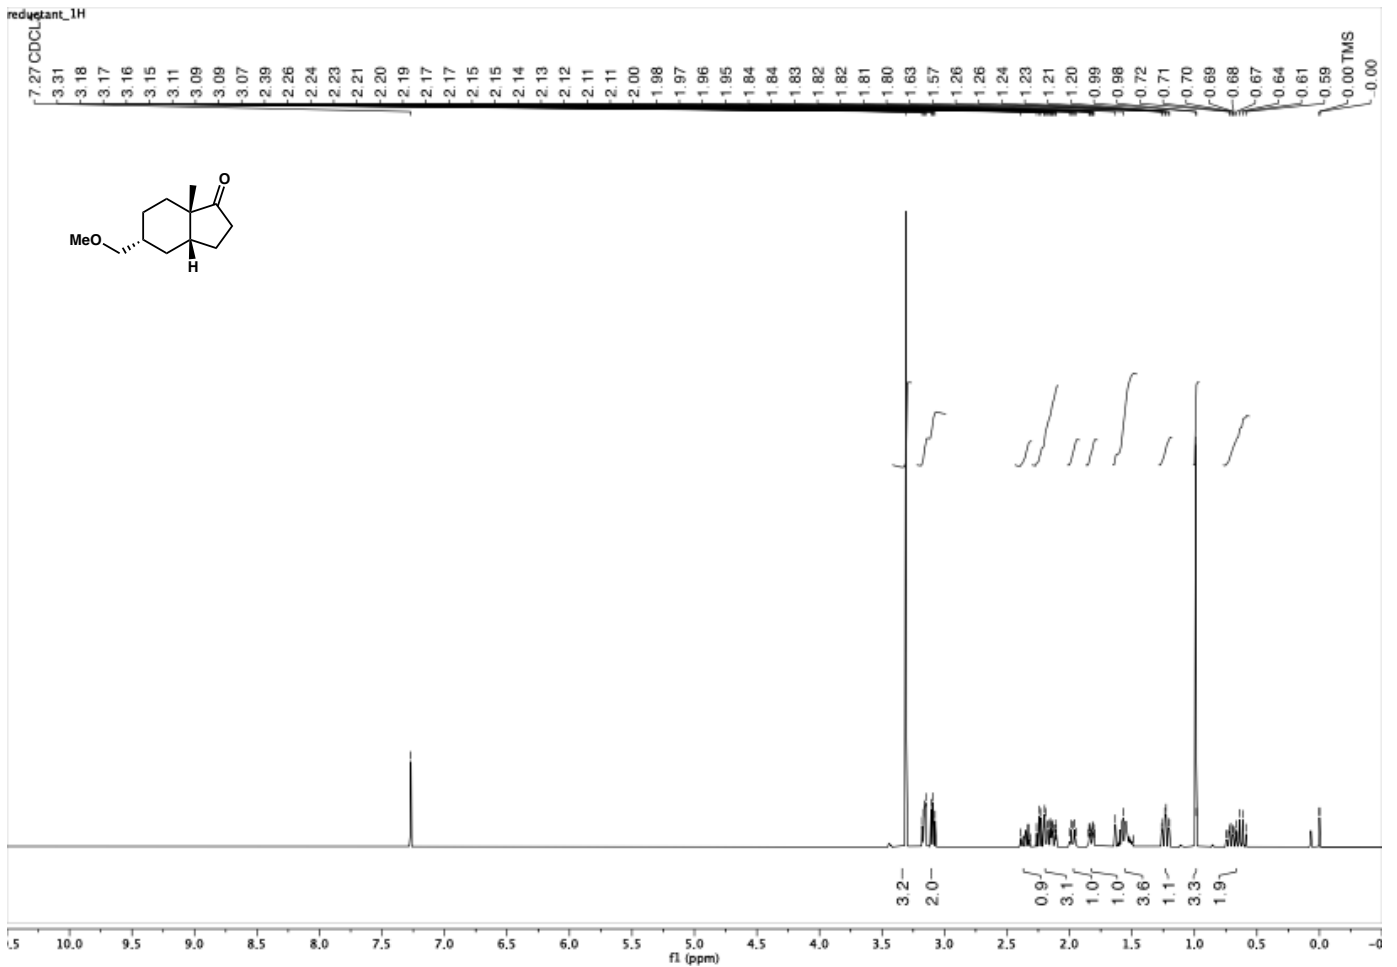

reductant\_OMe\_a\_13C

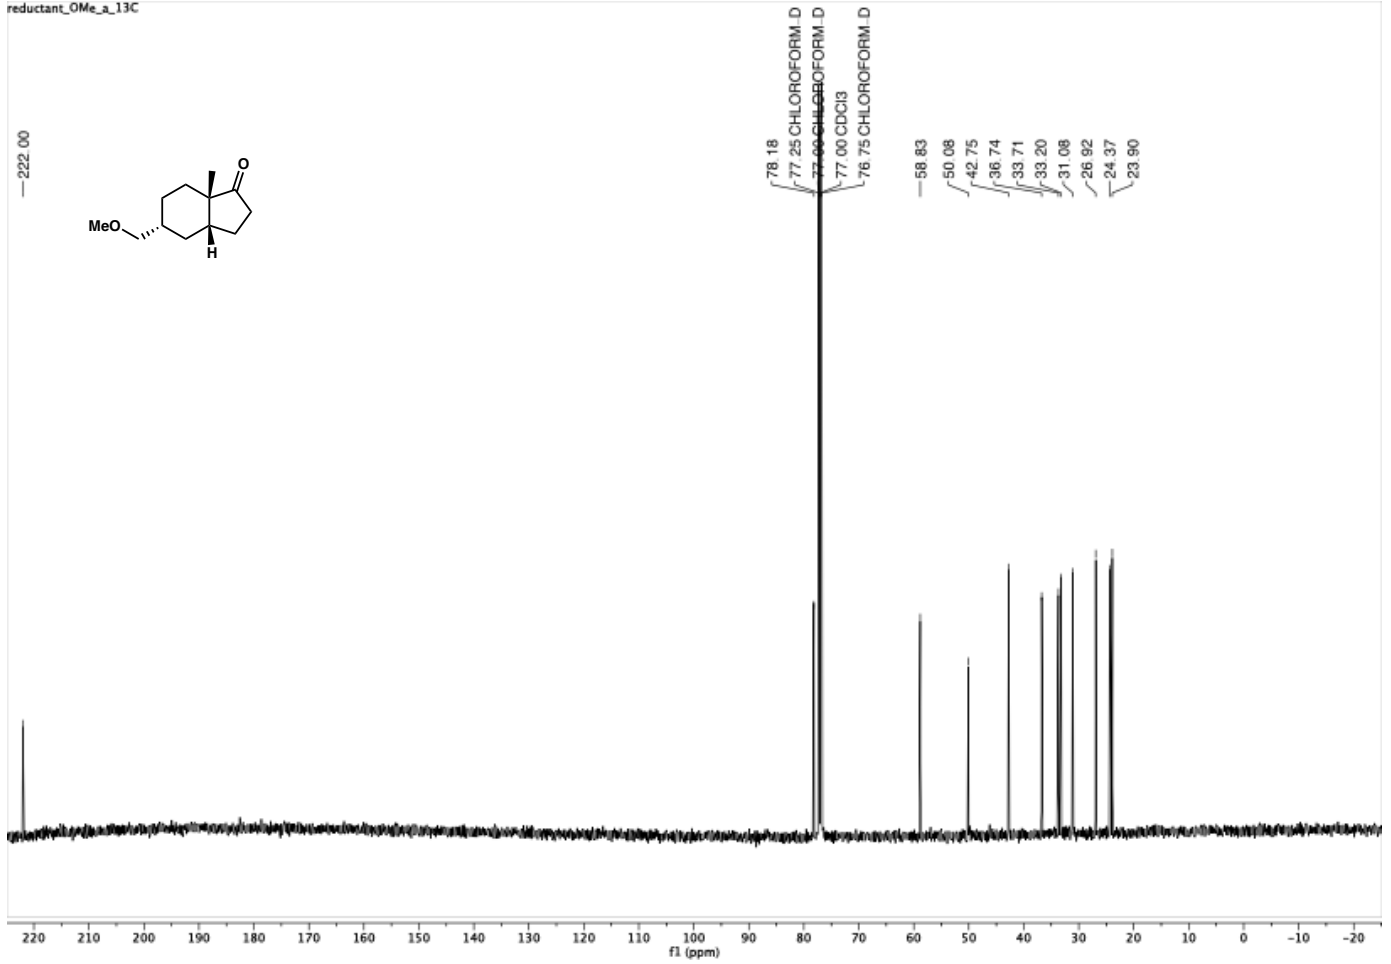

reductant\_OMe\_DEPT135\_

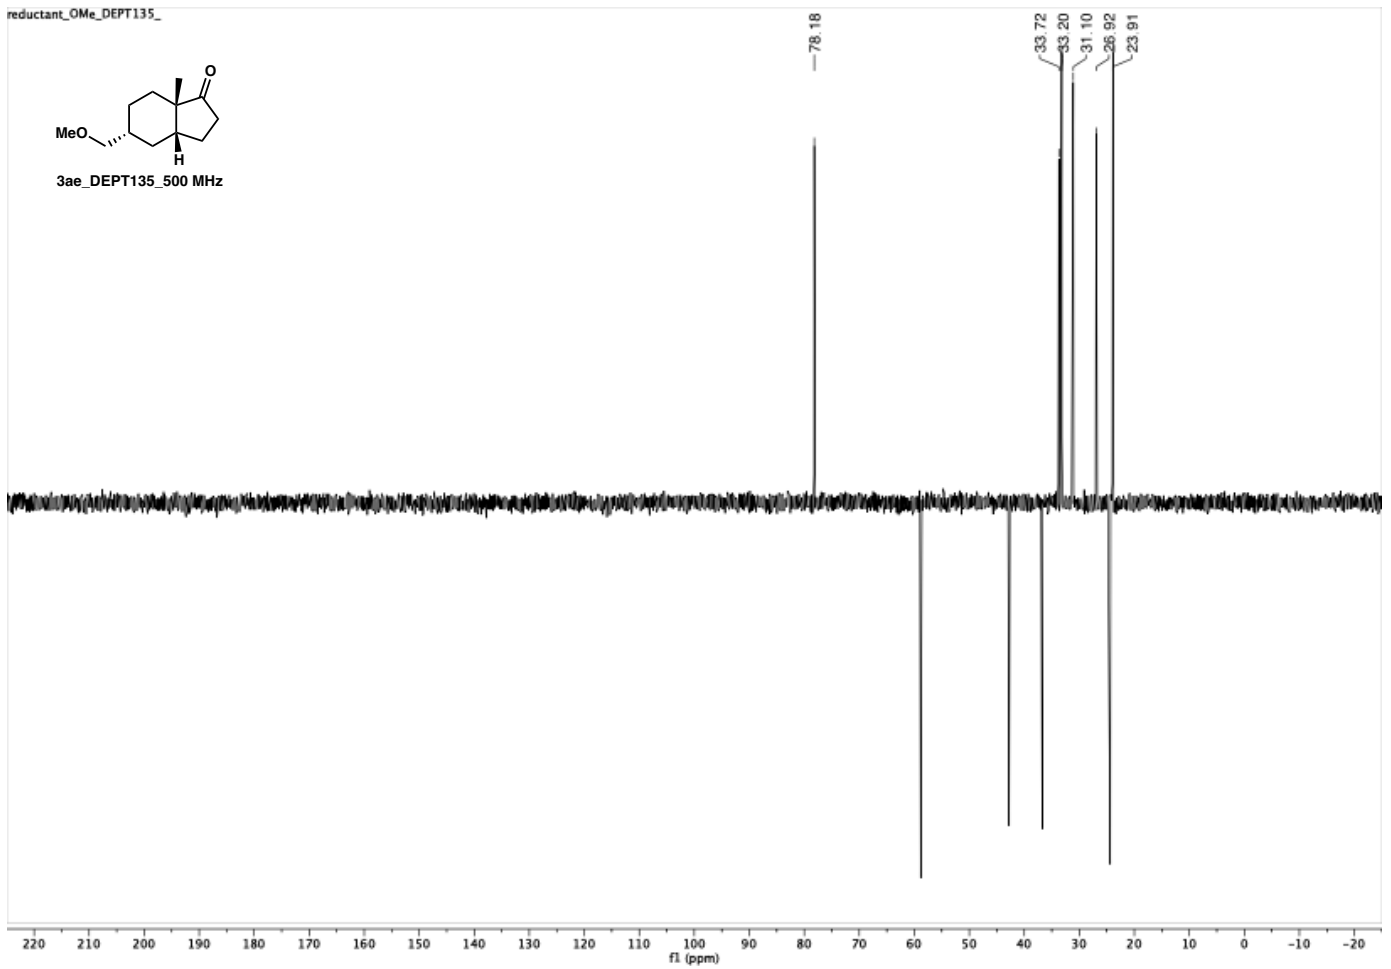

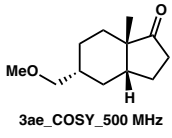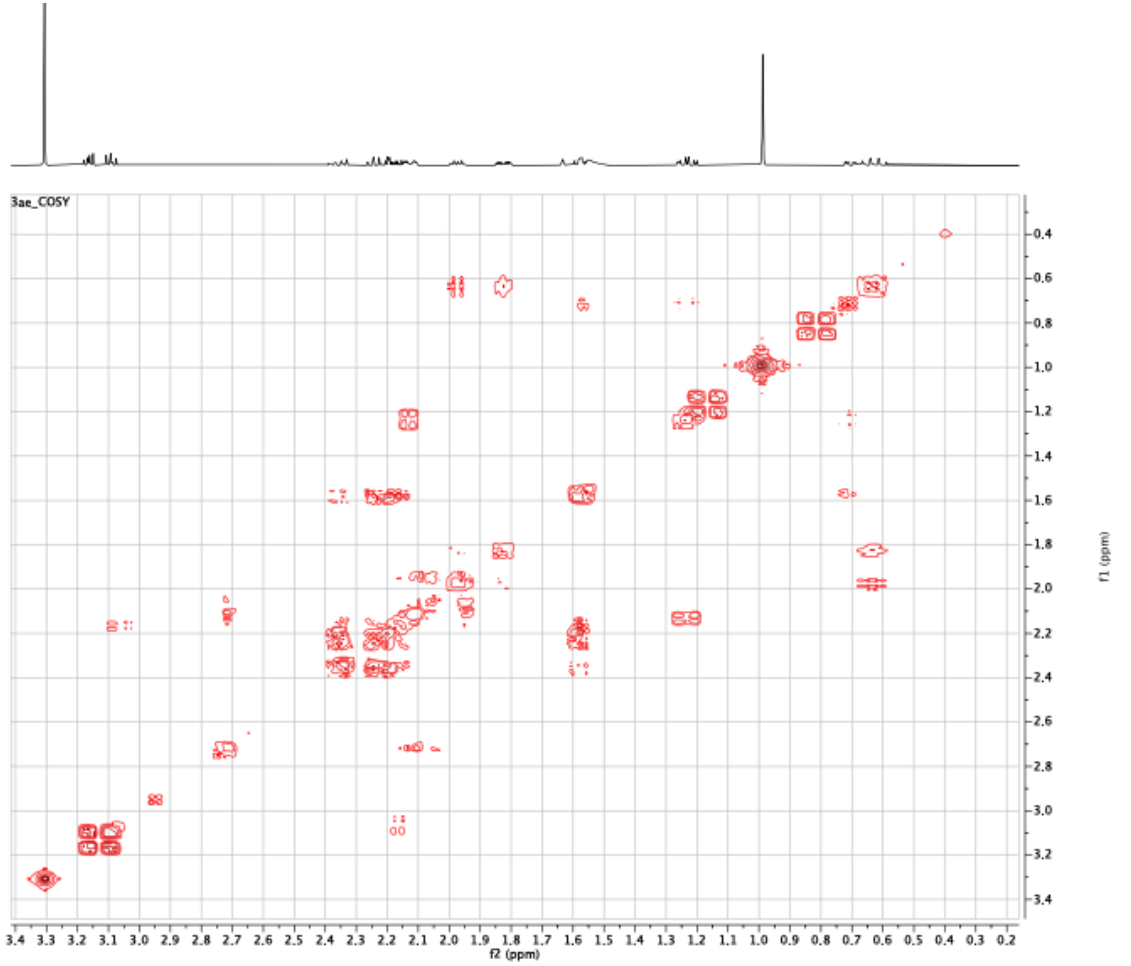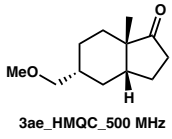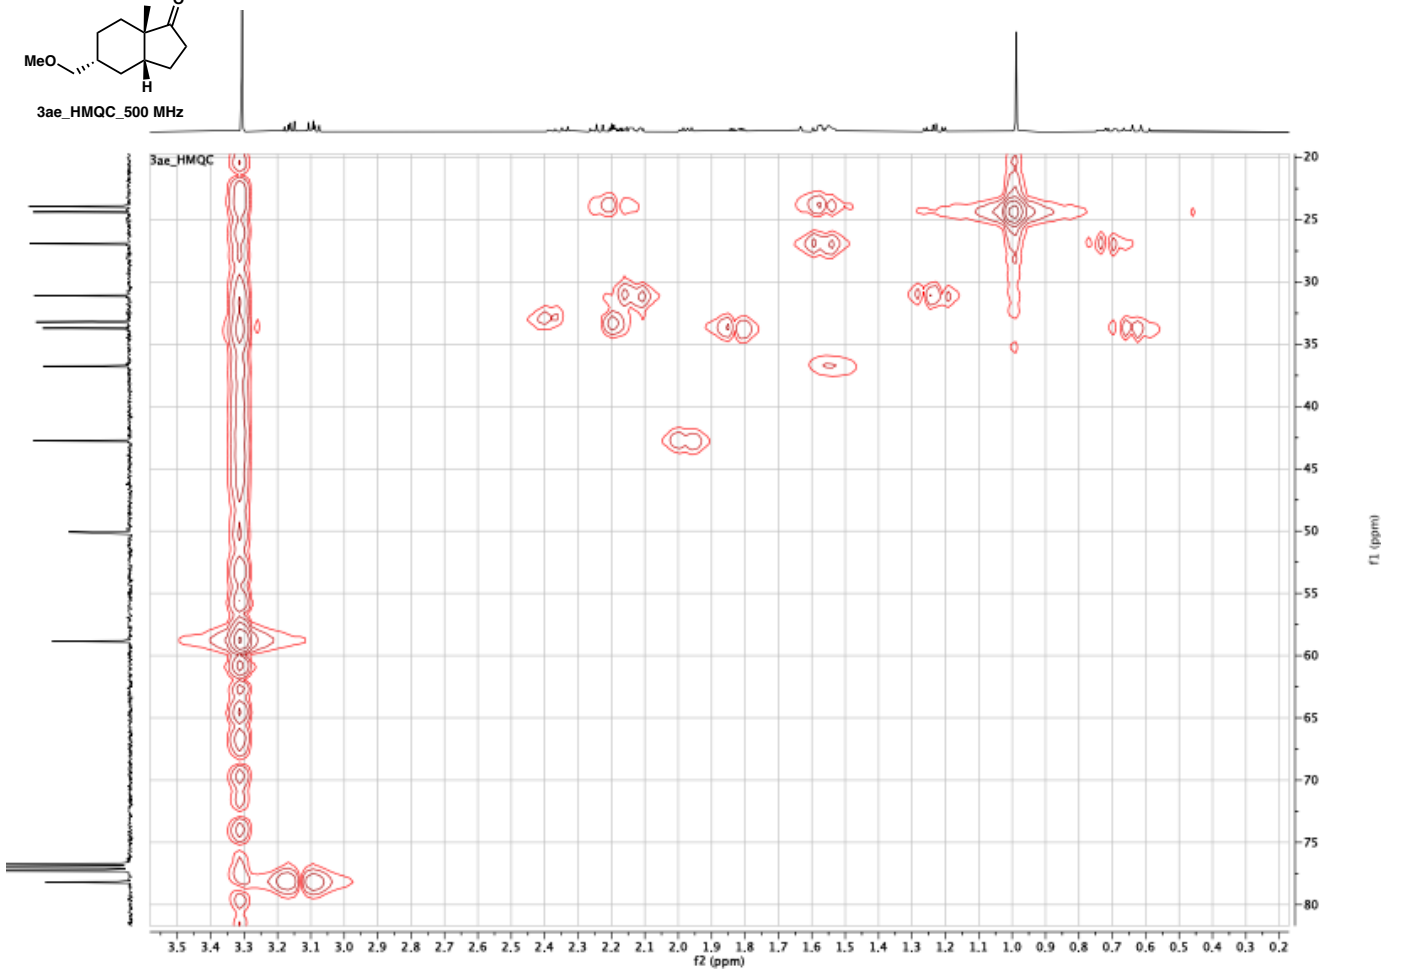

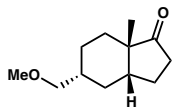

3ae\_HMBC\_500 MHz

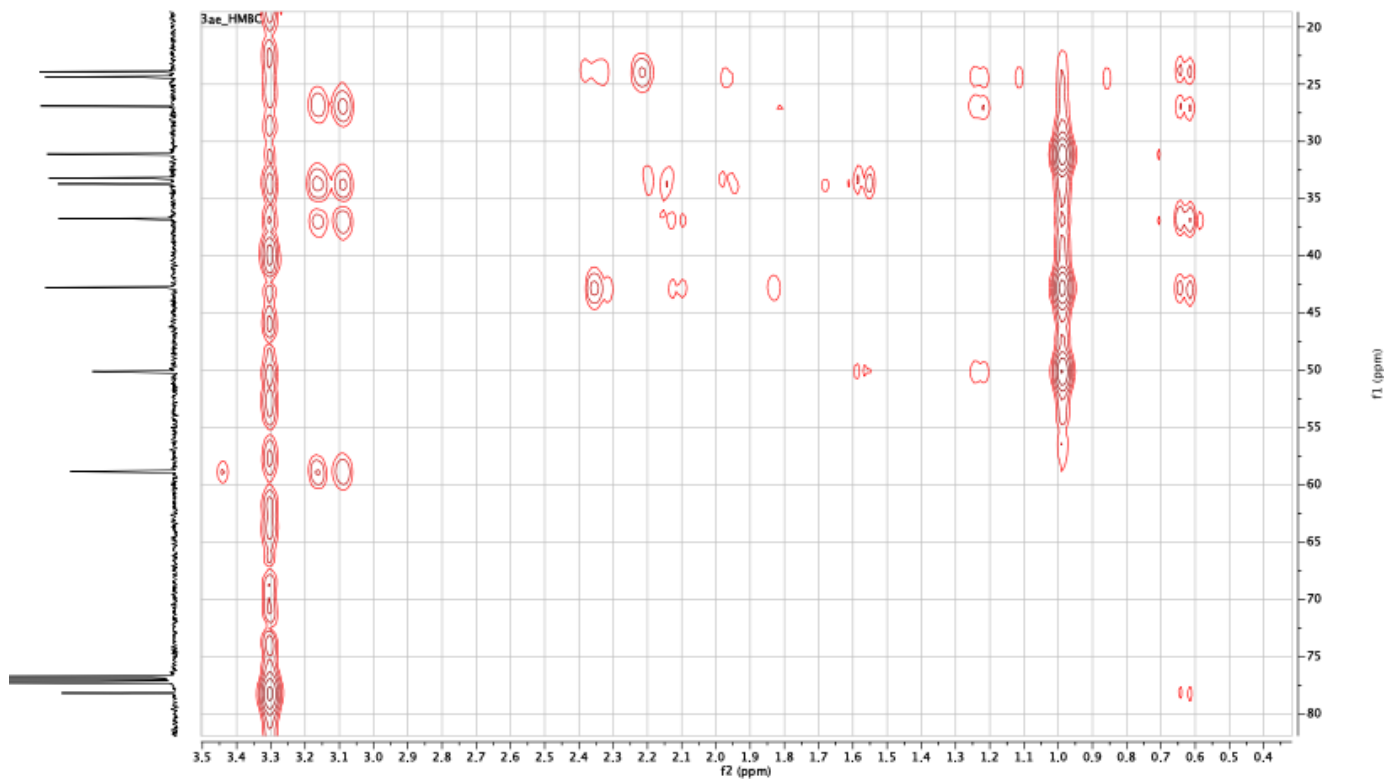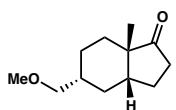

3ae\_HMBC\_500 MHz\_zoom

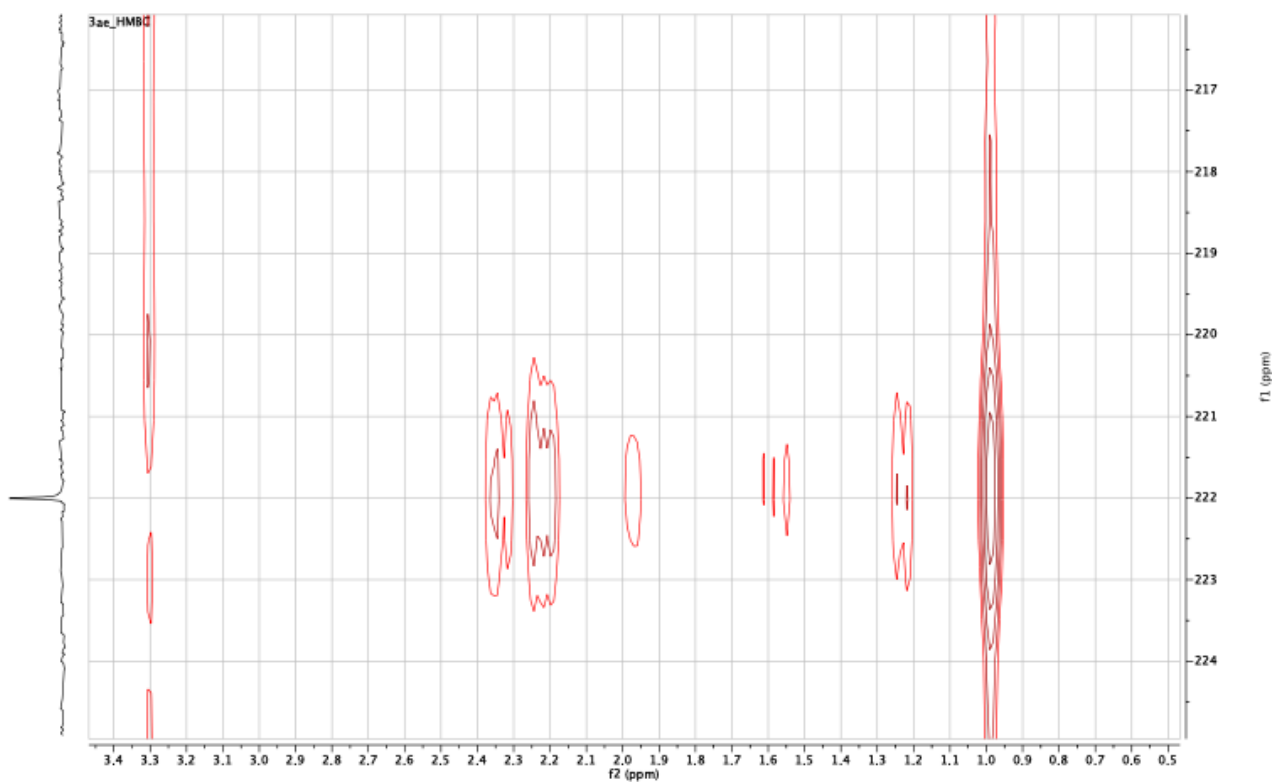



reductant\_b\_0Me\_1H

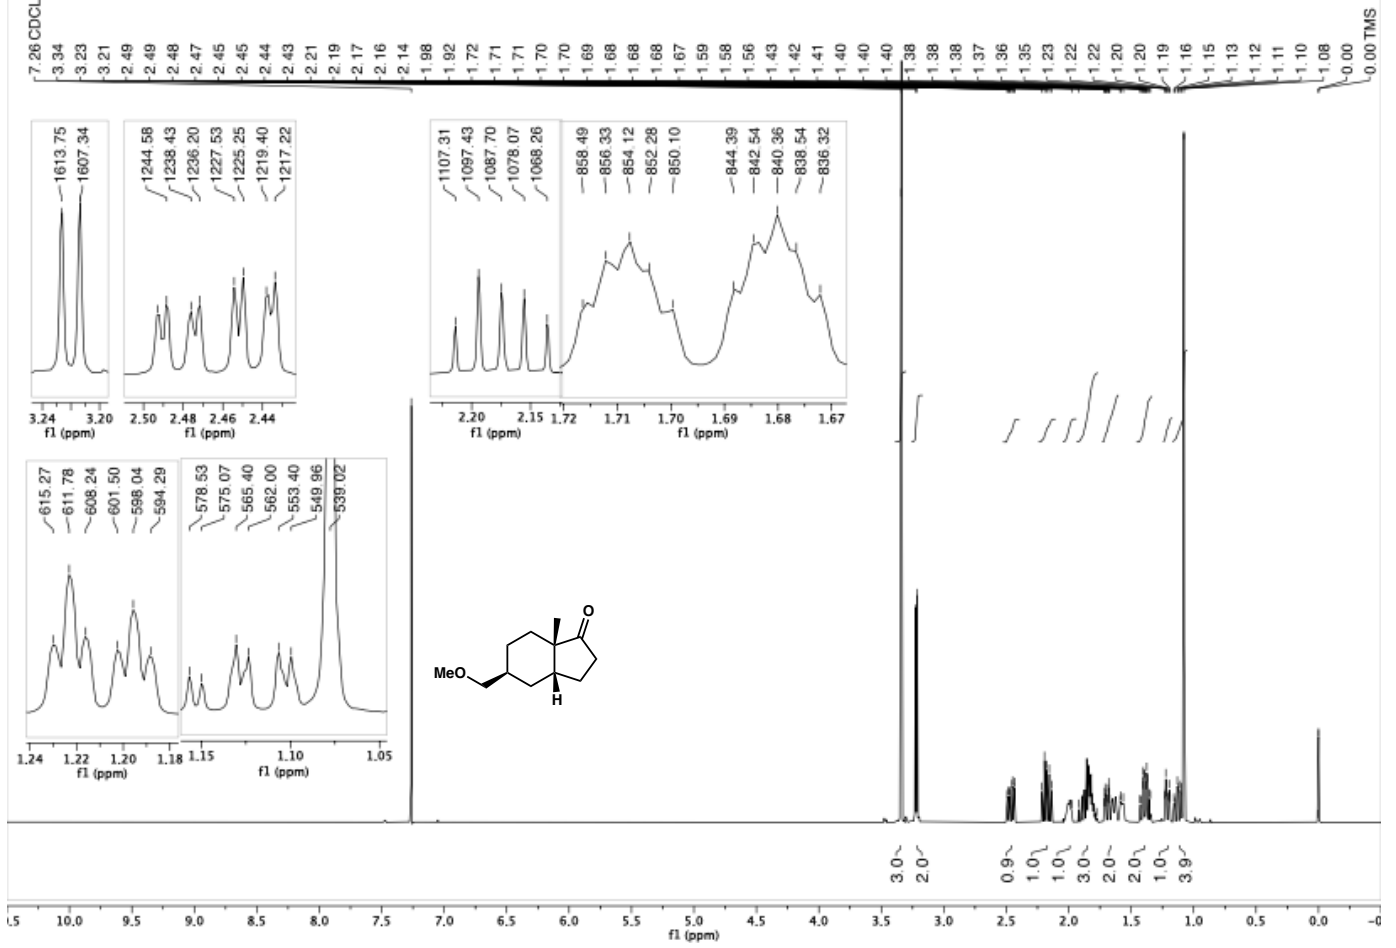

reductant\_b\_13C

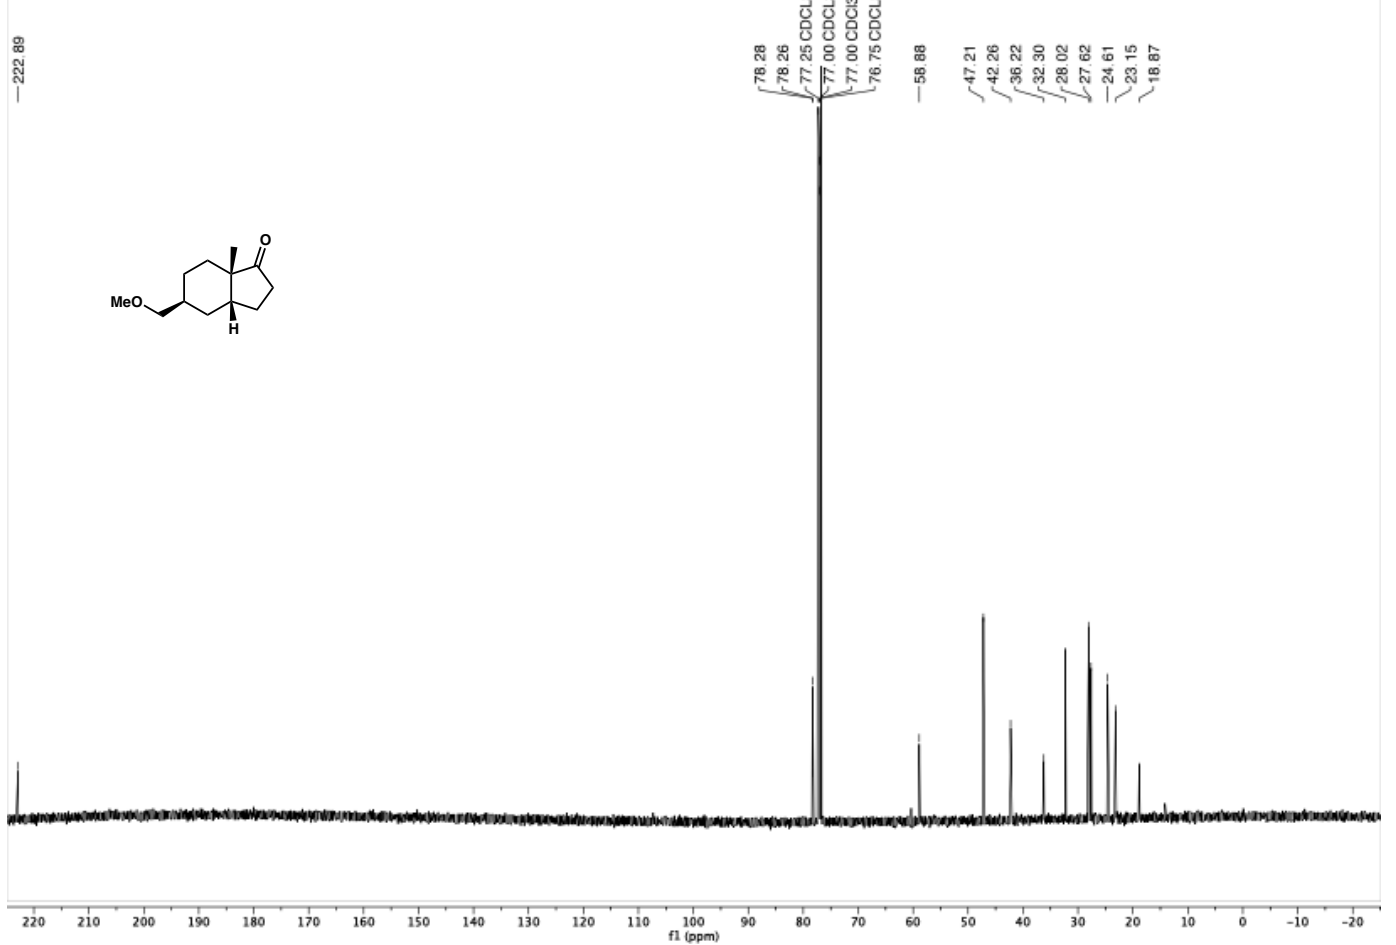

3be\_DEPT135

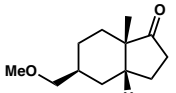

3be\_DEPT135\_500 MHz

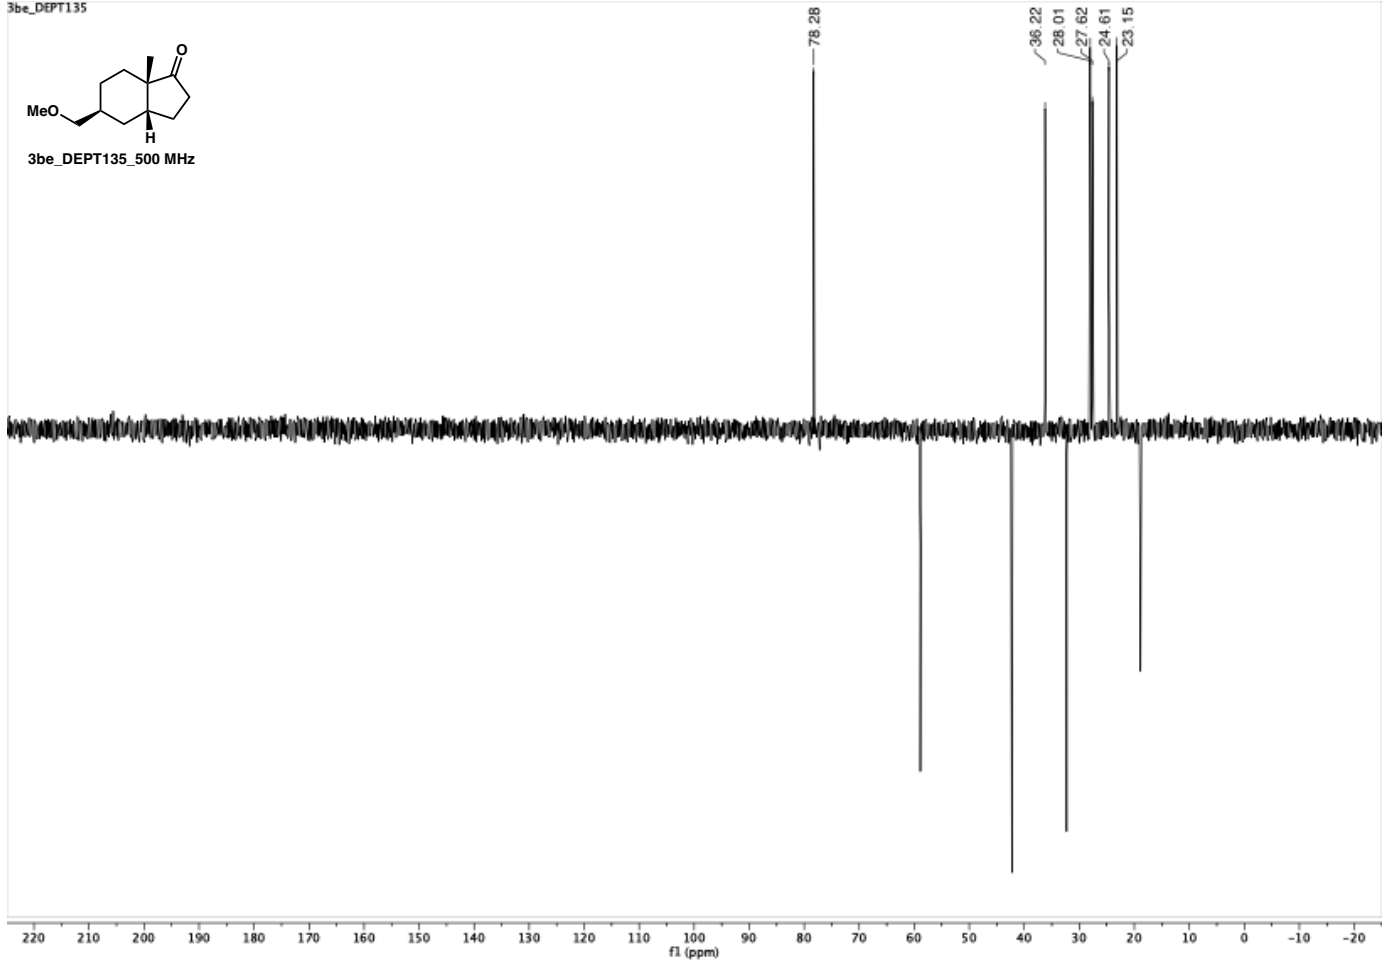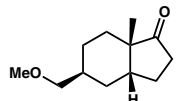

3be\_COSY\_500 MHz

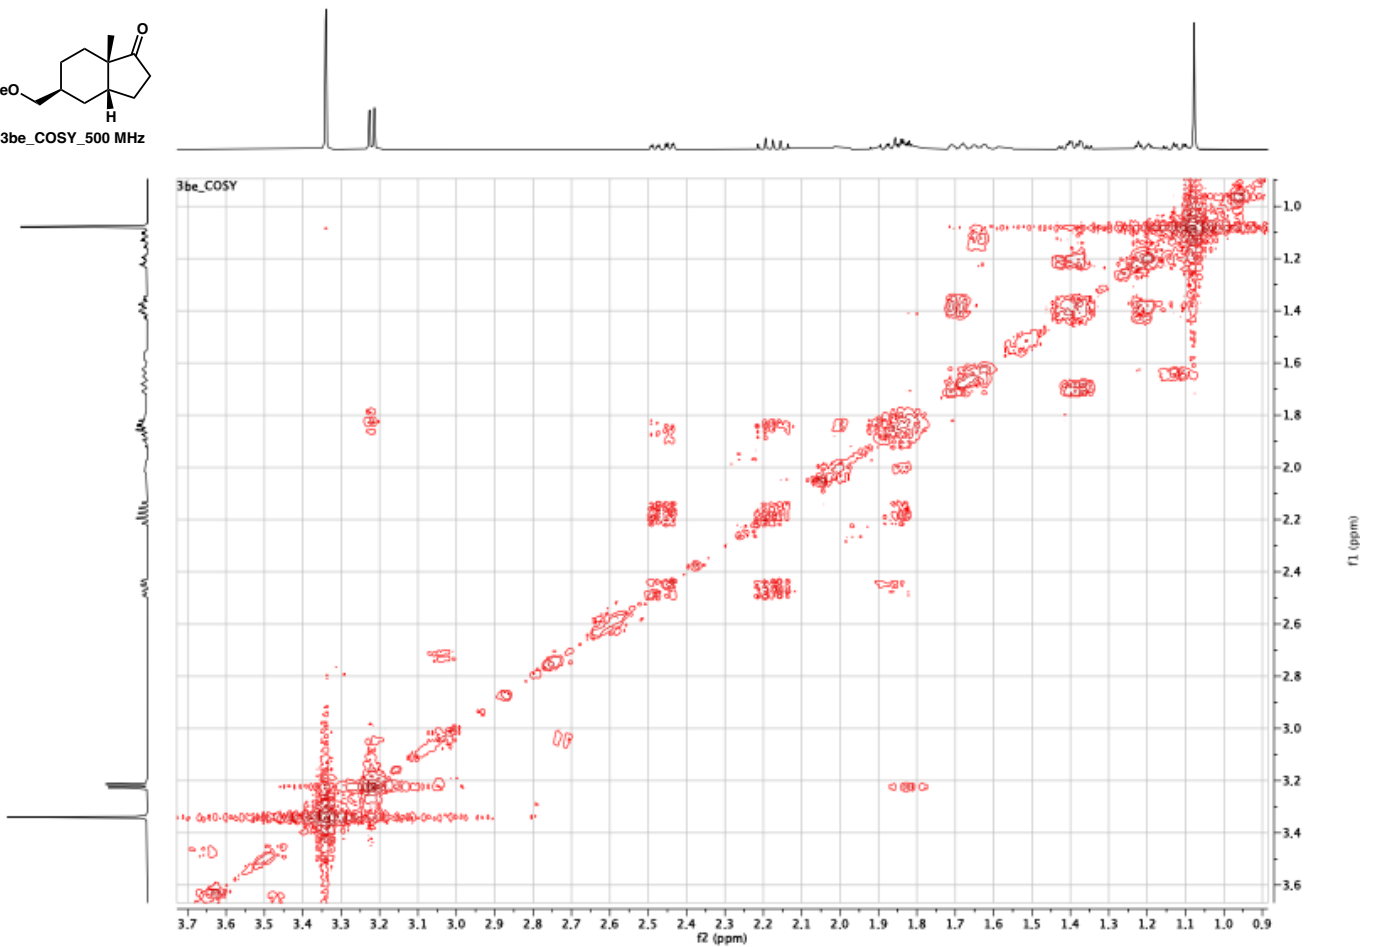

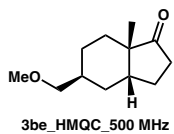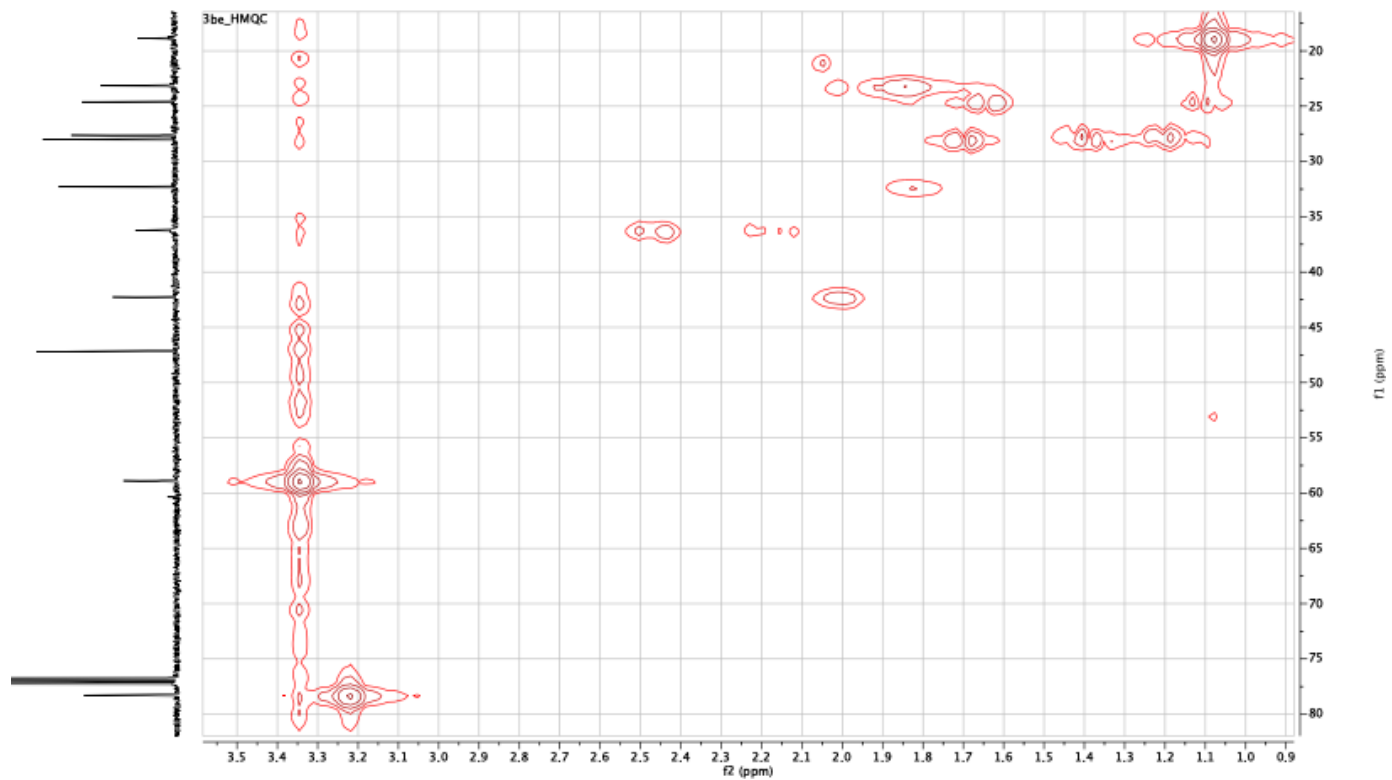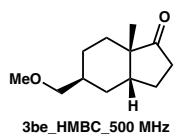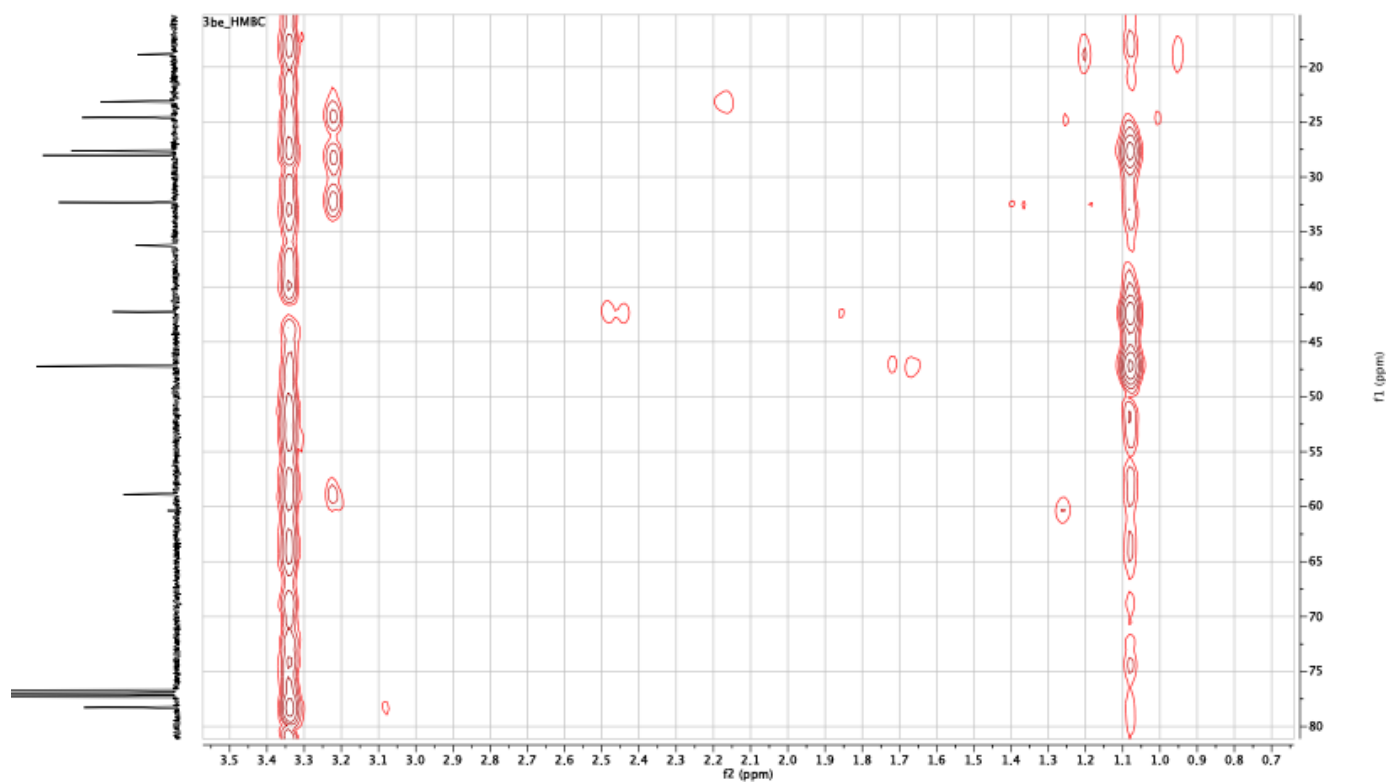

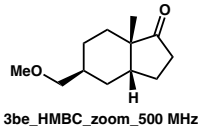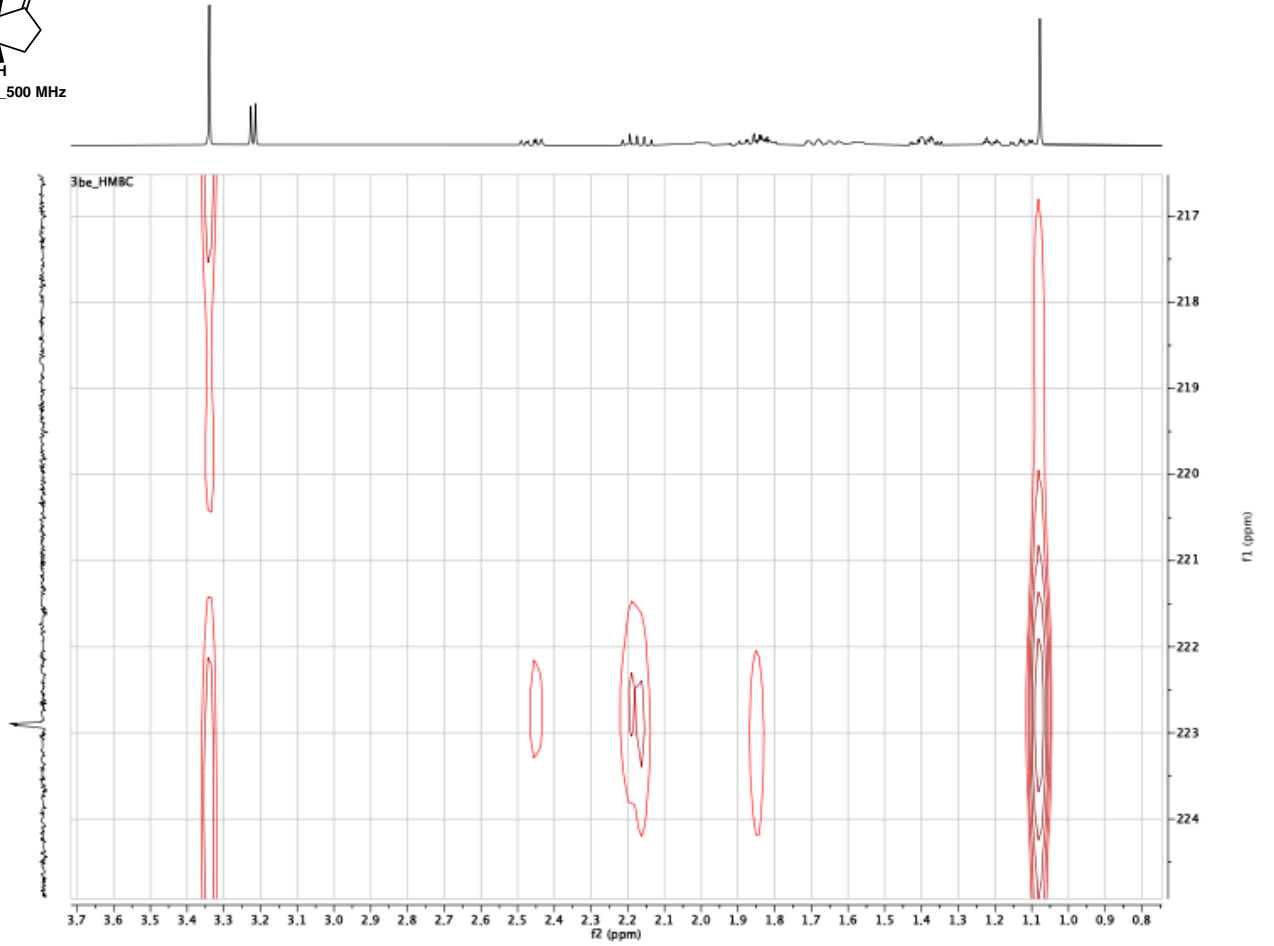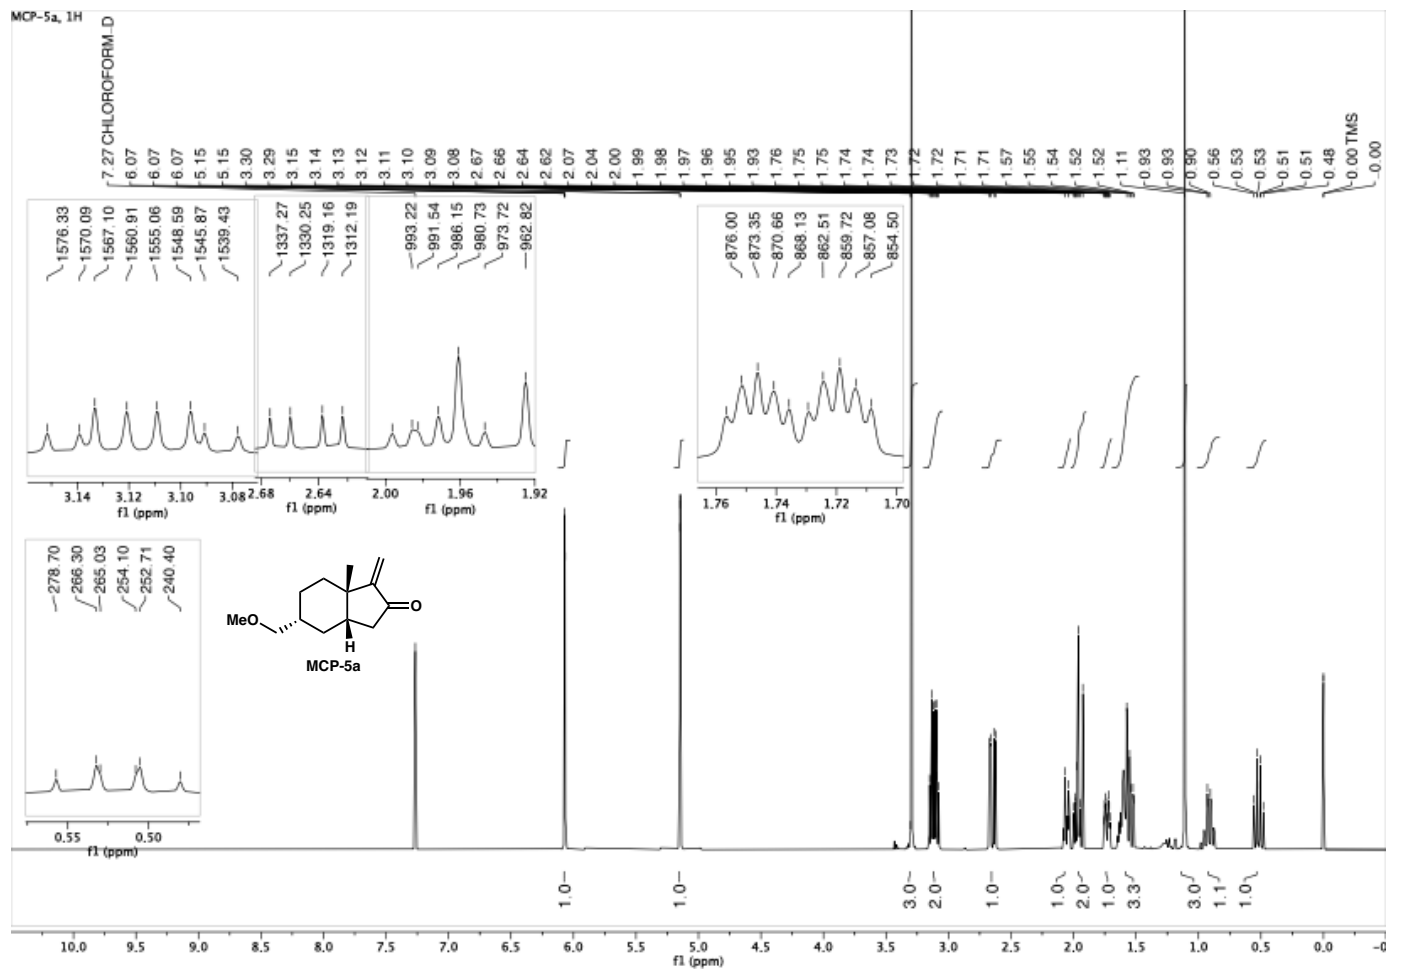

MCP-5a, 13C

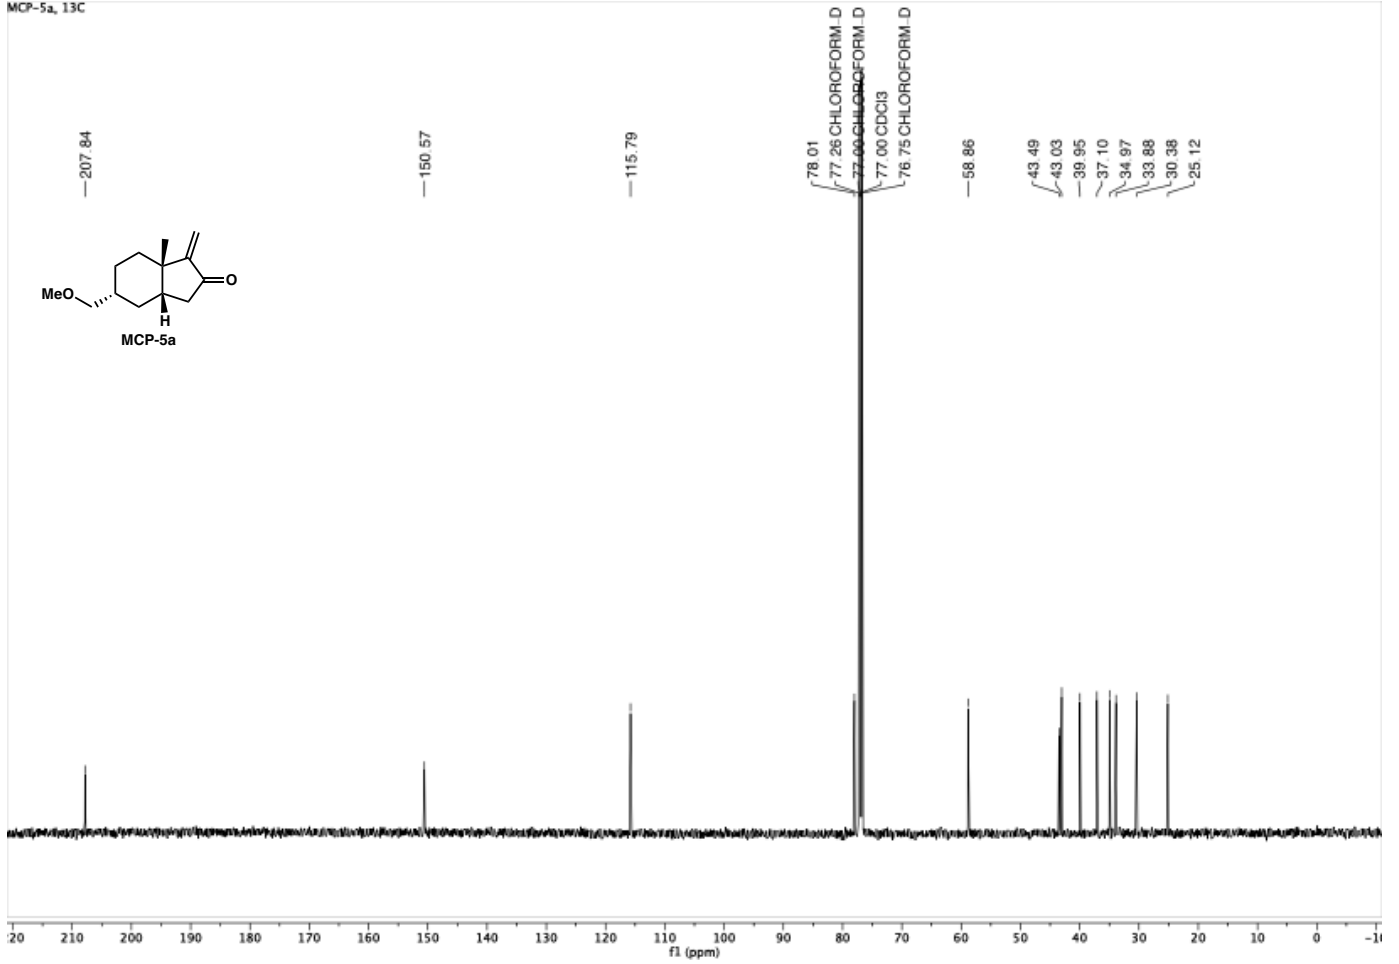

MCP-5b, 1H

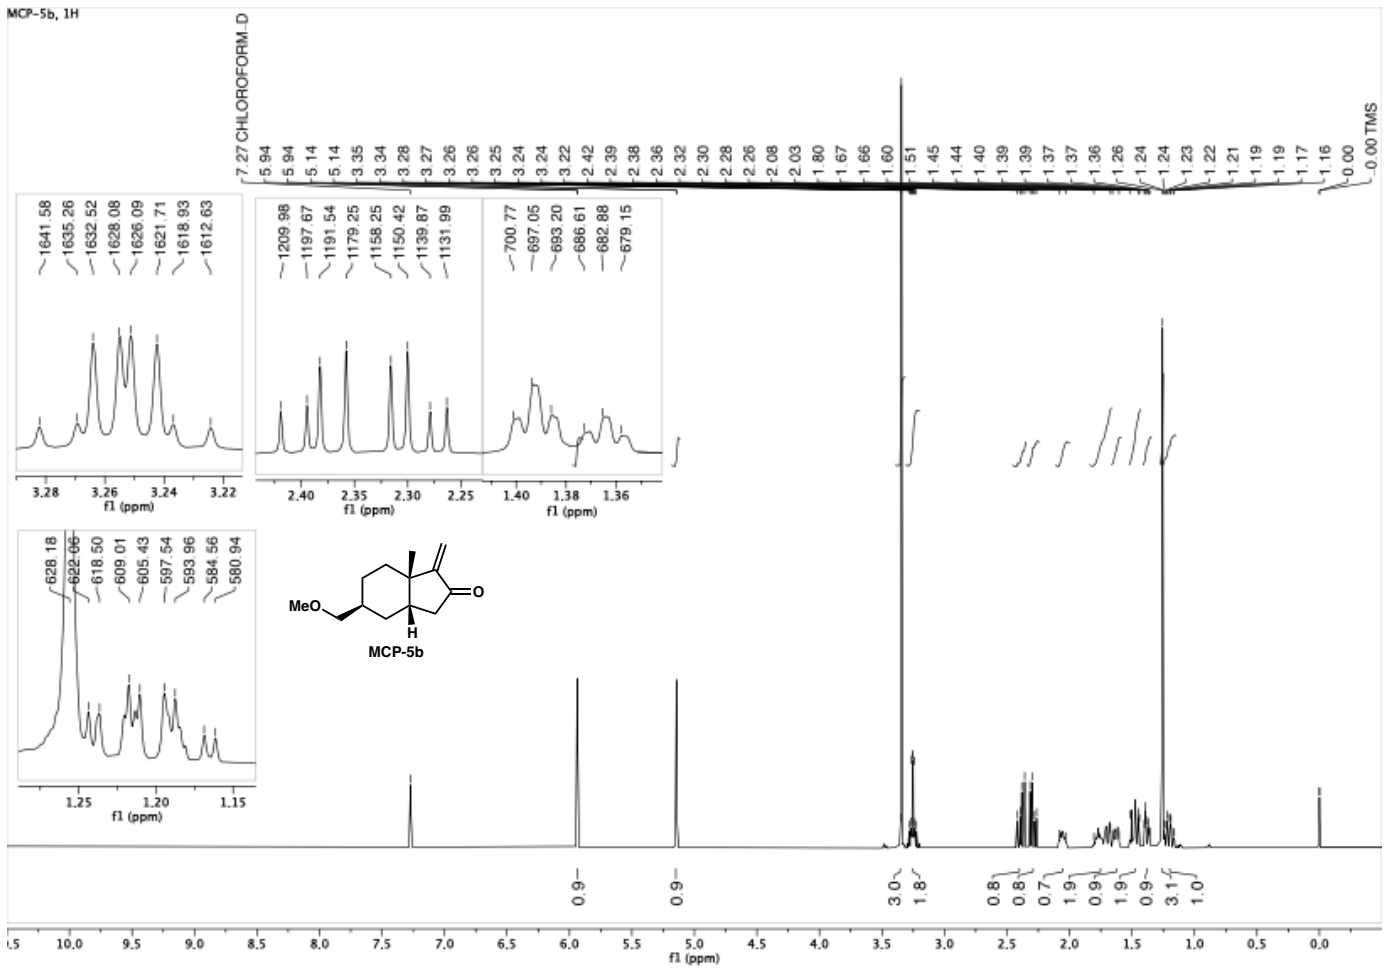

MCP-5b, 13C

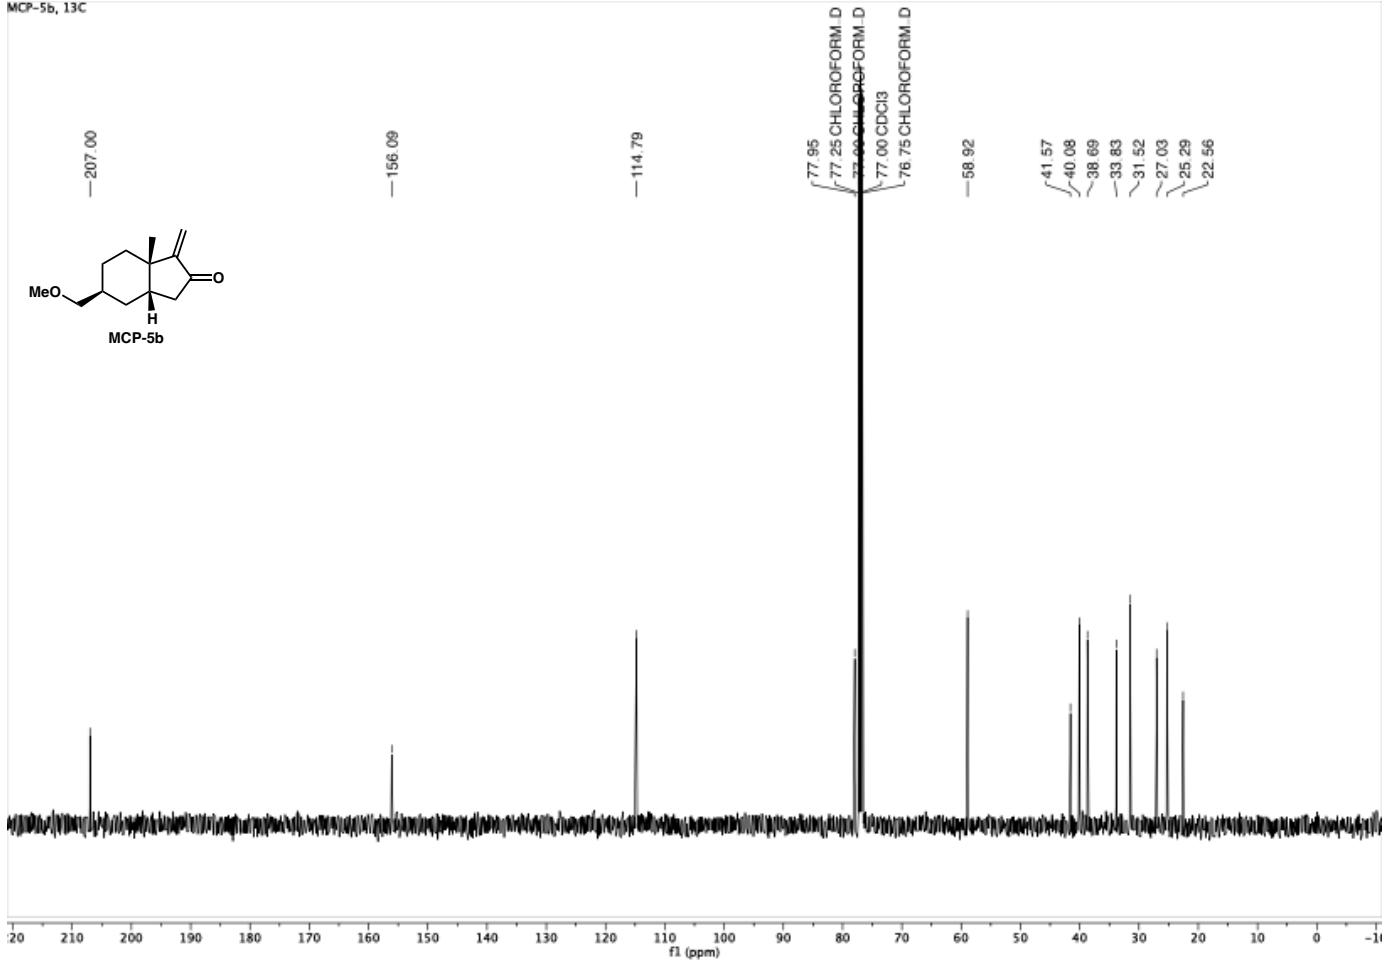

alkene CN, 1H

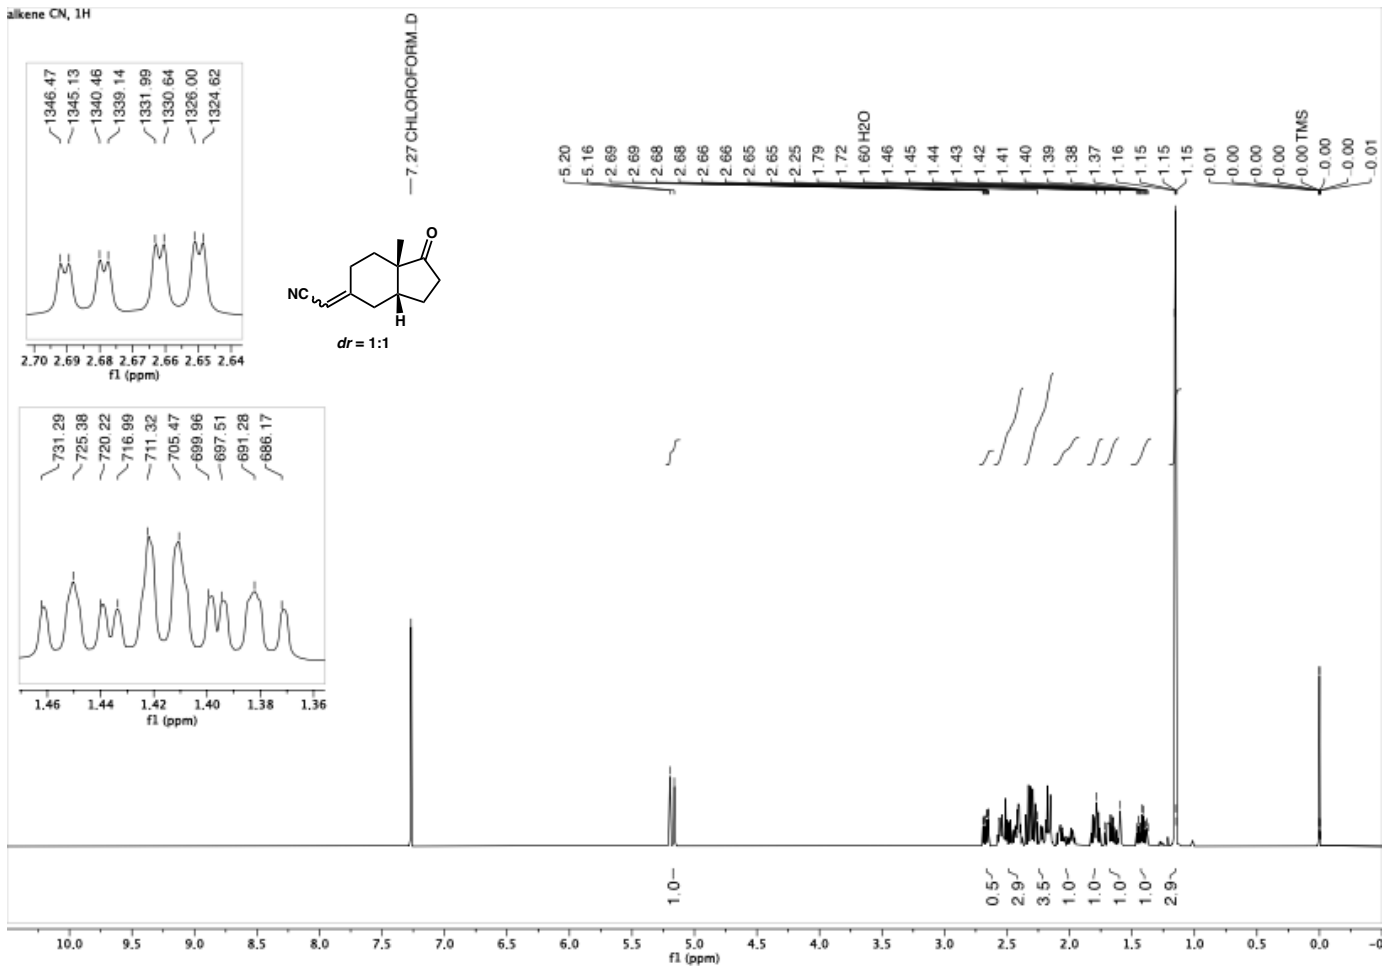



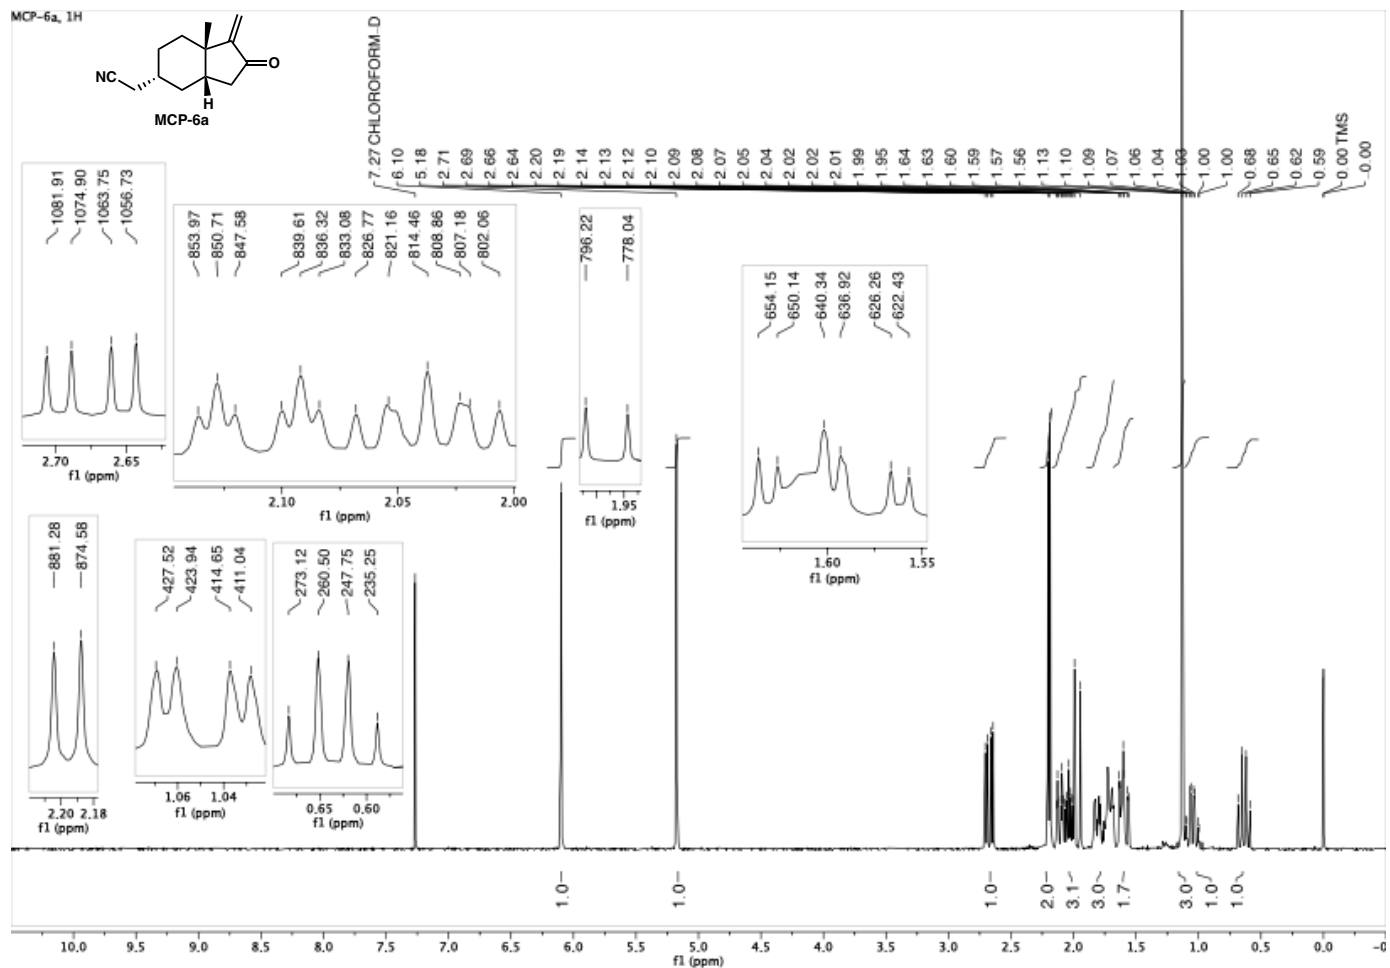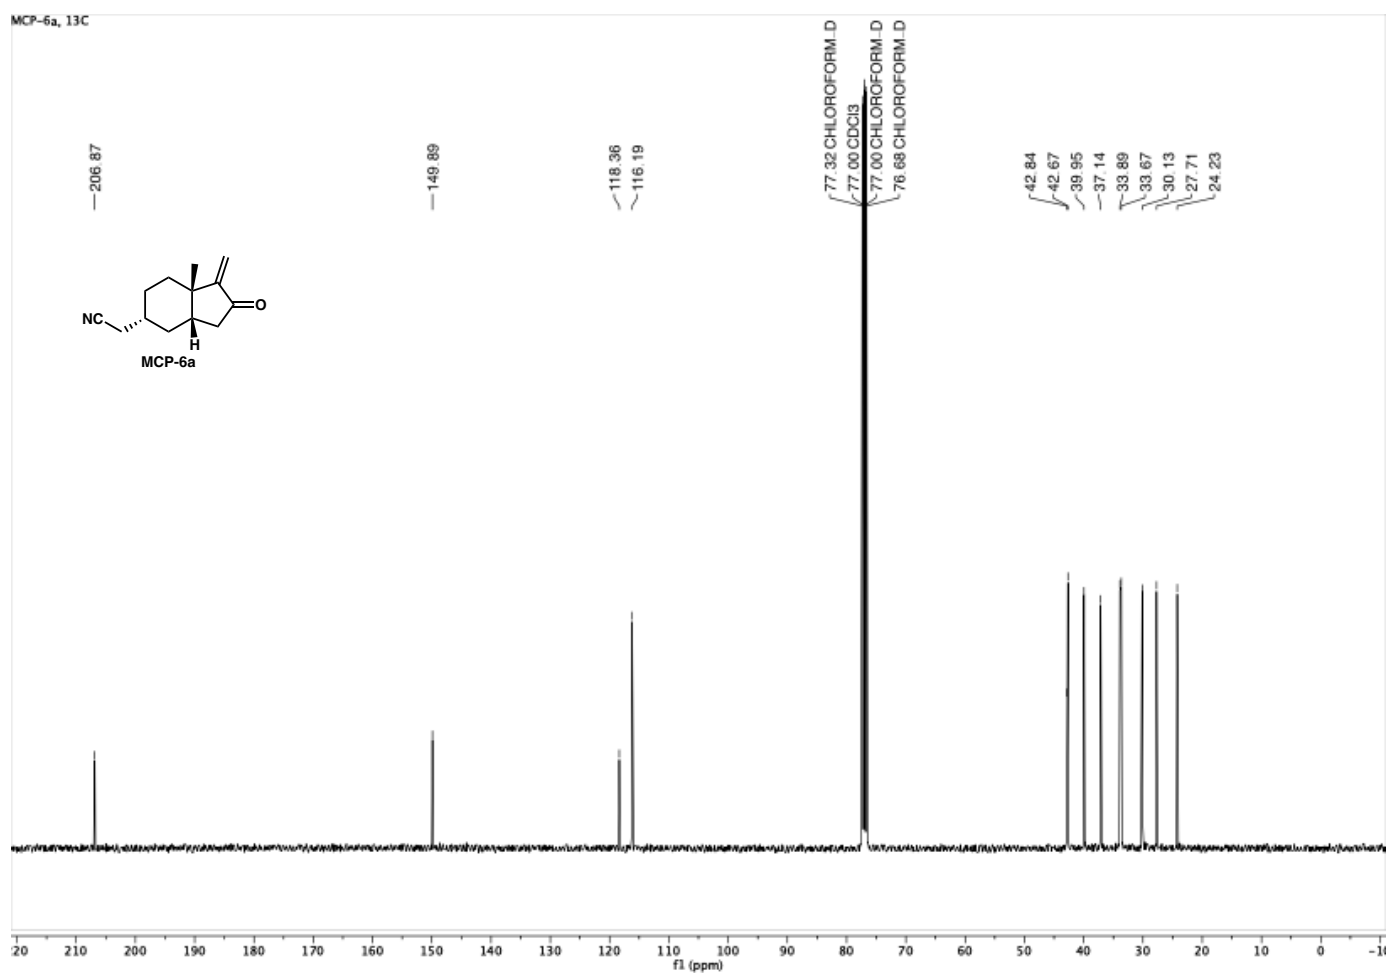



MCP-6b, 1H

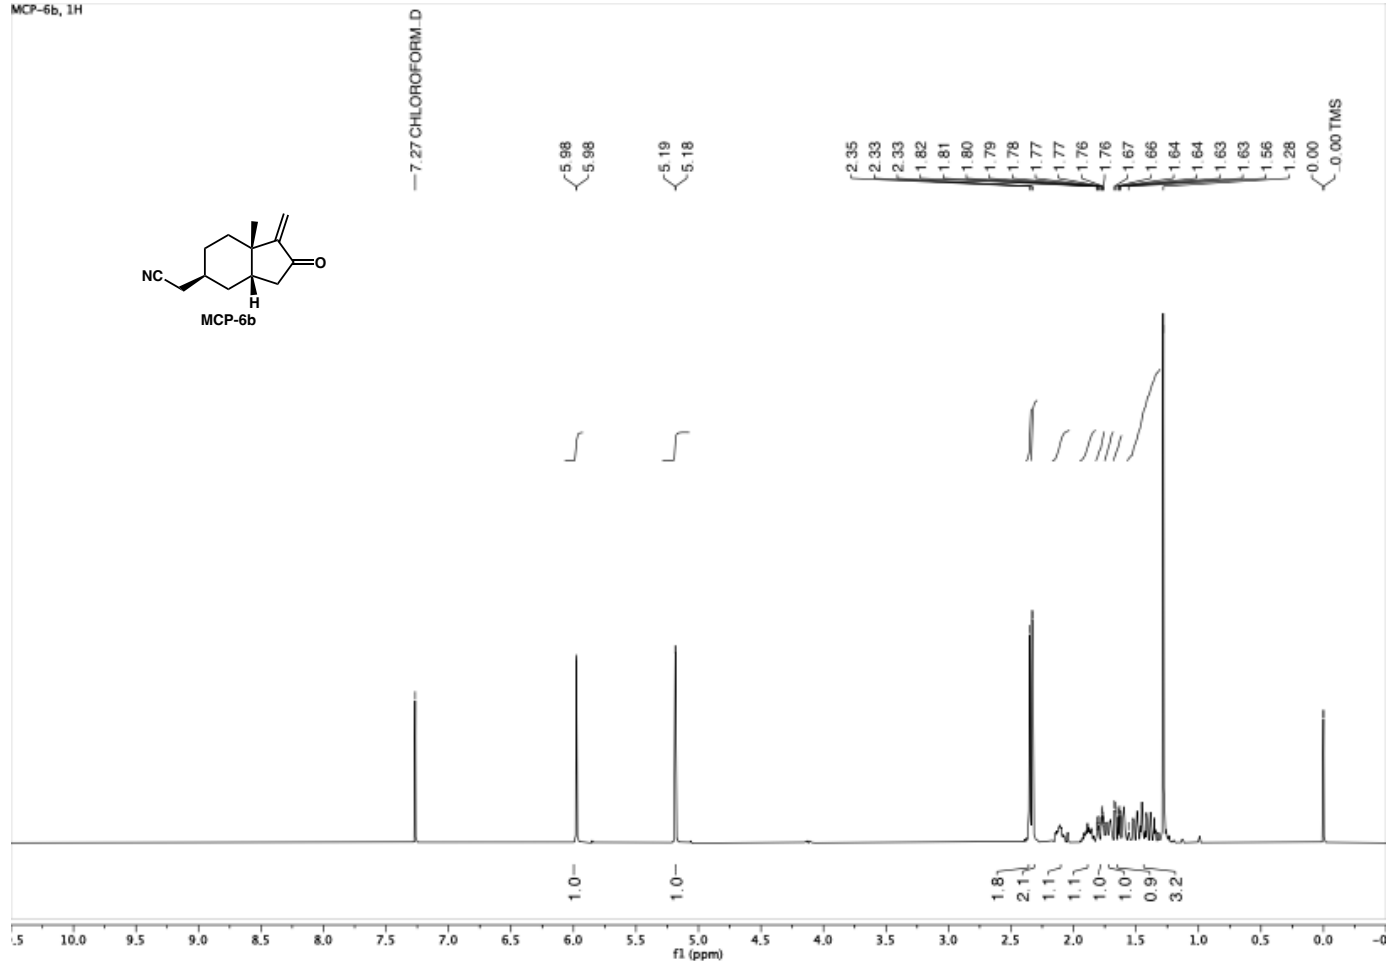

MCP-6b, 13C

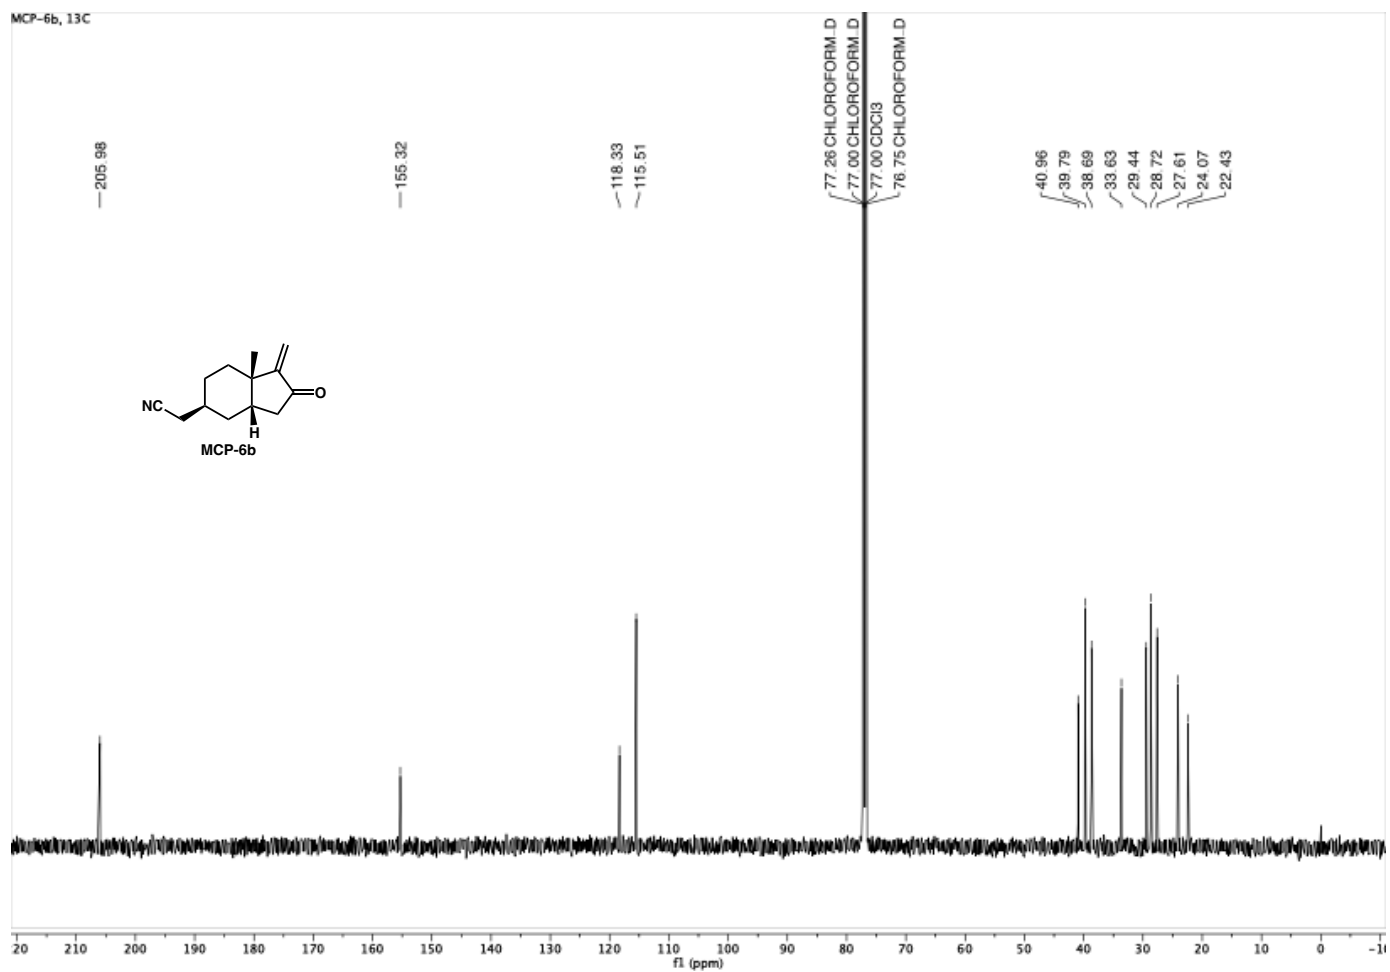

Supplement: d3ob00357d1.pdf [file d3ob00357d1.pdf]
